# Supplementary material
Source: publisher figshare collection journal article supplement (https://gsajournals.figshare.com/ndownloader/files/24250469)
Supplement: Supplementary file 1 [file 24250469]

## Sheet: BTx623 x IS3620c RIL
DNA	Year	REP	BD	MD	RD	WSW	WLW	DSW	DLW
1	2011	a	14.9	7.7	8	322	160	105	66
1	2011	b	11.1	7.2	6.9	222	76	77	38
2	2011	a	10.2	5.6	5.5	45	24	15	16
2	2011	b	9.6	4.8	4.5	60	41	18	24
3	2011	a	15.2	8.8	8.1	153	144	48	57
3	2011	b	19.9	11.8	9.6	333	244	100	92
4	2011	a	NA	NA	NA	NA	NA	NA	NA
4	2011	b	NA	NA	NA	NA	NA	NA	NA
5	2011	a	11.9	6.7	5.2	105	50	37	26
5	2011	b	11.8	6.6	6.6	36	28	13	15
6	2011	a	12.1	9.4	5.8	67	19	23	16
6	2011	b	14.6	6	5.6	55	15	17	13
7	2011	a	12.2	7.3	6.4	78	55	35	37
7	2011	b	10.5	6.8	5.9	23	16	8	13
8	2011	a	17.8	10.1	8.9	165	139	55	74
8	2011	b	10	9.3	7.1	106	60	26	32
9	2011	a	9.6	6.8	5.2	205	85	76	56
9	2011	b	12.4	10.6	6.7	65	37	25	27
10	2011	a	19.5	10.1	10.7	348	187	87	62
10	2011	b	14.1	7.9	7.8	80	38	24	17
11	2011	a	13.8	2.1	1.8	68	83	25	37
11	2011	b	11	4.8	5.5	40	48	13	21
12	2011	a	19.5	15.1	12.9	201	276	58	89
12	2011	b	18.1	9	9.4	58	57	17	29
13	2011	a	13.6	12.2	8.5	120	77	41	28
13	2011	b	16.9	12.2	9.7	136	76	47	31
14	2011	a	11.5	9	6.8	71	33	25	18
14	2011	b	11.3	8.5	7.4	56	29	20	18
15	2011	a	17.2	9.9	8.9	299	107	91	58
15	2011	b	16.7	8.7	8.4	108	53	32	24
16	2011	a	12.2	7.2	6.6	36	23	14	14
16	2011	b	8.2	6.1	5.6	18	12	8	8
17	2011	a	14.4	12.3	7.7	278	89	100	59
17	2011	b	9.7	7.7	5.8	188	66	52	37
18	2011	a	11.6	7.5	6.9	121	73	52	52
18	2011	b	17.5	9.9	7.9	220	87	80	55
19	2011	a	10.3	7.7	6	82	29	26	15
19	2011	b	10.1	5.8	5.4	42	9	15	8
20	2011	a	NA	NA	NA	NA	NA	NA	NA
20	2011	b	NA	NA	NA	NA	NA	NA	NA
21	2011	a	16	6.7	6.5	215	145	75	66
21	2011	b	10.4	7.1	6	244	145	87	68
22	2011	a	12	5.1	4.3	29	21	17	16
22	2011	b	8.8	6.4	5.5	53	31	23	16
23	2011	a	17.2	12	8.4	440	135	143	75
23	2011	b	14.5	9.8	7.6	164	66	51	38
24	2011	a	16.4	17.9	6.9	133	68	41	53
24	2011	b	14.5	6.4	6.6	166	194	58	99
25	2011	a	13.5	9.4	7.4	503	323	144	148
25	2011	b	NA	NA	NA	NA	NA	NA	NA
26	2011	a	22	9.2	8.9	114	87	40	64
26	2011	b	16.8	8.3	7.8	95	86	33	53
27	2011	a	9.9	8.3	6.2	115	60	46	29
27	2011	b	14.8	10.4	8.2	78	48	30	23
28	2011	a	14.5	7.7	6.7	125	120	39	54
28	2011	b	13.6	7.4	7.3	86	51	26	29
29	2011	a	9	7.3	6.1	98	60	41	29
29	2011	b	12.4	9.4	7.1	169	93	56	40
30	2011	a	9.7	6.9	4.9	138	69	43	32
30	2011	b	10.7	8.2	6	240	140	72	59
31	2011	a	18.3	9.1	8.7	187	114	56	56
31	2011	b	14.3	6.2	5.5	121	91	38	48
32	2011	a	17	12.2	8	139	73	49	32
32	2011	b	17.3	8	7.4	328	172	116	75
33	2011	a	9.6	11.3	8	52	41	20	21
33	2011	b	16.9	9	7.8	74	46	NA	NA
34	2011	a	14.1	9.9	8.8	63	60	21	25
34	2011	b	18.9	13.8	13	101	52	28	30
35	2011	a	22.4	15.5	12	222	52	66	40
35	2011	b	14.5	10.8	9.4	68	22	20	19
36	2011	a	13.4	13.7	7.5	93	41	28	24
36	2011	b	10	5.7	5.1	66	29	23	21
37	2011	a	11.2	6.2	7.3	30	25	14	22
37	2011	b	7.7	6.6	5.8	34	17	13	12
45	2011	a	9.4	6.6	4.7	107	31	30	28
45	2011	b	11.2	11.7	8.2	96	22	30	15
46	2011	a	14.4	7.1	6.2	266	343	78	127
46	2011	b	19.2	8.1	8.3	208	230	58	90
47	2011	a	14.9	8.8	7.8	427	456	120	153
47	2011	b	11.6	6.5	5.3	149	192	50	88
48	2011	a	13.1	10.6	8	137	41	48	20
48	2011	b	10.7	7.2	6.6	335	164	126	70
49	2011	a	7.9	8.5	6.2	153	59	49	26
49	2011	b	11.1	9.7	7.4	250	74	76	35
50	2011	a	9.9	10.2	7.4	238	77	63	46
50	2011	b	11.6	10.8	8.4	511	154	143	93
51	2011	a	16.2	11.6	8.8	558	214	108	90
51	2011	b	19.9	16.5	11.2	300	121	88	58
52	2011	a	14.4	9.8	8.3	191	123	63	62
52	2011	b	12	9.3	8.5	63	25	17	19
53	2011	a	NA	NA	NA	NA	NA	NA	NA
53	2011	b	NA	NA	NA	NA	NA	NA	NA
54	2011	a	16.8	8.2	7.4	180	185	58	76
54	2011	b	15.5	8.2	7.6	97	54	36	40
55	2011	a	18.8	20.1	11.9	342	143	92	50
55	2011	b	13.8	13.7	8.4	184	116	53	37
56	2011	a	8.3	7	5	192	109	78	48
56	2011	b	5.7	4.1	3	201	136	76	53
57	2011	a	11.6	8.6	6.3	29	14	10	8
57	2011	b	10.8	6.6	6.3	56	38	18	15
58	2011	b	15	10.1	8	135	76	49	43
59	2011	a	15.4	9.7	8.3	176	115	53	47
59	2011	b	12.7	7.9	6.9	74	54	24	23
60	2011	a	15.2	12.2	7.5	284	137	87	65
60	2011	b	12.6	6.3	5	37	18	13	15
61	2011	a	10.2	8.3	5.8	143	64	64	38
61	2011	b	9.7	8	6	120	50	51	30
62	2011	a	14.4	11.1	7.1	105	57	39	27
62	2011	b	13.9	10.5	7.8	158	83	58	45
63	2011	a	8.7	4.8	5.1	156	197	52	61
63	2011	b	8.8	5.2	5.6	65	71	23	27
64	2011	a	13.8	9.7	7.1	148	59	55	44
64	2011	b	12.1	10	5.3	341	113	119	54
65	2011	a	15.8	10.2	9.1	90	50	29	27
65	2011	b	14.1	8.9	8.6	331	186	95	72
66	2011	a	11.6	12.7	8.2	114	46	29	20
66	2011	b	17.5	10.2	8.2	265	151	82	63
67	2011	a	16.7	8.9	8.5	36	11	10	9
67	2011	b	18.8	8.8	9.4	100	39	36	30
68	2011	a	18.5	8.1	9.4	135	116	41	51
68	2011	b	17	9.3	8.4	66	55	22	29
69	2011	a	12.1	8.7	4.1	157	110	52	51
69	2011	b	12	11.2	8.6	418	293	144	119
70	2011	a	12.2	8.5	6.6	168	67	69	35
70	2011	b	8.4	6.2	5.3	129	46	58	27
71	2011	a	13.3	9.7	7	102	57	44	30
71	2011	b	12.3	10	7.2	107	46	43	31
72	2011	a	14.5	7.7	7.6	130	130	47	60
72	2011	b	14.4	9	8.1	138	142	50	61
73	2011	a	18.9	12.3	10.2	175	146	52	65
73	2011	b	14.7	9.8	8.5	411	351	127	130
74	2011	a	9.6	5.5	4	78	62	26	28
74	2011	b	8.5	5.4	4.4	37	17	14	14
75	2011	a	14	10.7	8	142	92	54	45
75	2011	b	15.5	12.9	8	120	84	41	42
76	2011	a	22	10.7	9.6	394	253	114	100
76	2011	b	22.1	8.4	7.8	354	331	109	134
77	2011	a	22.5	11.3	11.8	87	45	26	29
77	2011	b	21.6	9.7	10.8	106	38	30	34
78	2011	a	10.6	7.6	5.6	174	116	62	56
78	2011	b	9.7	6.5	4.2	258	142	88	68
79	2011	a	11.1	8.1	7	80	28	25	16
79	2011	b	7.1	5	4.3	130	38	47	23
80	2011	a	13.3	6.9	7.7	137	103	53	67
80	2011	b	13.9	7.2	5.9	336	216	110	87
81	2011	a	16.3	12.9	8.6	307	103	83	58
81	2011	b	16.3	10.6	7.5	250	64	63	36
82	2011	a	17.6	9.4	9.1	87	91	30	36
82	2011	b	18.8	9.5	9.1	95	101	21	39
83	2011	a	11	11	7.2	273	112	66	47
83	2011	b	14.2	13.2	9.2	163	84	44	35
84	2011	a	15.7	9.3	6	227	177	80	84
84	2011	b	17.1	12.6	7.4	315	150	123	71
85	2011	a	9.3	7.8	5.3	45	28	19	15
85	2011	b	15	6.6	6.7	37	12	14	10
86	2011	a	14.6	7.3	7.2	89	66	23	34
86	2011	b	16.2	7.4	7.2	183	117	49	55
87	2011	a	12.9	10	6.8	299	141	105	60
87	2011	b	9.9	11.4	6.3	73	28	26	17
88	2011	a	14.4	11.9	8.6	183	91	71	61
88	2011	b	18.3	15.2	11	364	173	133	96
89	2011	a	17.4	10.8	11.4	73	76	20	32
89	2011	b	11.7	8.5	7.6	34	41	8	26
90	2011	a	14.8	10.5	7.8	147	67	52	44
90	2011	b	11.3	9.1	5.8	249	123	85	65
91	2011	a	16.5	8.6	7	263	143	68	78
91	2011	b	19.5	7.2	10.6	133	46	31	32
92	2011	a	19.2	15.2	10.2	264	105	80	50
92	2011	b	18.7	11.9	10.4	321	141	97	57
93	2011	a	20.1	11.8	10.2	346	122	112	52
93	2011	b	19.9	17.9	10	161	57	51	29
94	2011	a	14.7	10.2	5.1	55	26	23	20
94	2011	b	16.2	8.8	9	44	34	18	26
95	2011	a	17.2	13.7	9.9	246	124	96	65
95	2011	b	15.7	8	7	86	48	36	32
96	2011	a	15.7	13.2	7.7	105	30	41	21
96	2011	b	13.5	5.2	6.7	54	22	22	20
97	2011	a	13.4	7.5	6.4	267	139	83	75
97	2011	b	12.7	6.3	5	78	45	26	24
98	2011	a	13.5	8.2	6.9	121	51	32	29
98	2011	b	12.6	7.1	5.7	142	96	40	41
99	2011	a	14.4	9.4	6.6	189	67	62	34
99	2011	b	16	10.1	8.4	202	81	64	37
100	2011	a	14.2	12.2	6.5	315	260	90	85
100	2011	b	13.5	9.9	5.8	153	108	49	38
101	2011	a	20.7	8.7	9.4	125	86	35	44
101	2011	b	13.5	7.7	7.7	27	23	9	15
102	2011	a	15.6	9.3	7.8	185	162	60	66
102	2011	b	14.7	8.7	8	101	79	35	35
103	2011	a	21.8	10.6	9	144	69	52	46
103	2011	b	18.7	9.2	7.3	53	27	18	21
104	2011	a	9.1	8.1	5.3	246	51	50	27
104	2011	b	14.9	9.4	9.4	450	207	111	90
105	2011	a	16.3	8.2	7.8	94	79	35	43
105	2011	b	16.6	11.3	8	70	50	27	27
106	2011	a	12.3	7.7	7.2	313	190	122	97
106	2011	b	15.1	6.3	6	88	64	35	44
107	2011	a	15	10	7.8	146	70	54	54
107	2011	b	11.3	6.3	5.3	114	56	41	43
108	2011	a	14.7	12.5	7.6	617	272	338	153
108	2011	b	17.4	13.9	9.2	1095	370	187	109
109	2011	a	14.4	8.3	7.2	110	56	40	34
109	2011	b	17	9.4	7.9	110	77	40	38
110	2011	a	9.8	6.1	5.2	77	28	25	18
110	2011	b	12.7	9.7	8	130	67	39	39
111	2011	a	19.8	9.6	7.8	108	52	44	34
111	2011	b	11.6	8.4	6	136	112	54	64
112	2011	a	18.6	7.3	7.6	64	34	20	28
112	2011	b	19	6	6.6	114	106	39	56
113	2011	a	17.2	13.8	9.6	416	186	107	78
113	2011	b	18.5	16.7	12.2	252	120	62	48
114	2011	a	15.4	13	9.9	501	205	136	92
114	2011	b	19.4	12	7.6	505	187	151	86
115	2011	a	14.7	9.3	9.2	246	70	65	38
115	2011	b	14.1	14.1	10	136	61	39	26
116	2011	a	13.7	8.2	7.4	204	187	56	93
116	2011	b	NA	NA	NA	NA	NA	NA	NA
117	2011	a	17.4	12.1	8.7	150	56	45	29
117	2011	b	15.2	7.9	7.5	231	154	78	69
118	2011	a	17.9	9.9	9.7	70	66	24	32
118	2011	b	16.5	11.8	8.5	113	94	45	48
119	2011	a	11.1	7.2	6.6	77	49	26	29
119	2011	b	18.1	8.8	7.8	211	159	69	59
120	2011	a	13.6	14.3	8.6	163	76	52	40
120	2011	b	19.4	10.5	7.3	229	103	79	58
121	2011	a	11.8	8.9	6.9	392	116	122	67
121	2011	b	12.2	9.1	6.1	247	90	72	53
122	2011	a	19.6	10.1	8.9	71	77	24	33
122	2011	b	19.8	10.7	9	75	80	22	34
123	2011	a	14.2	11.9	8.3	225	81	76	51
123	2011	b	12.6	10.9	7.6	293	91	96	59
124	2011	a	16.9	10.9	9.6	212	136	72	79
124	2011	b	13.5	12.1	8.9	113	41	41	29
125	2011	a	14.3	12.7	8.1	690	312	211	134
125	2011	b	17.8	15.4	9	470	144	126	66
126	2011	a	13.4	8.3	7.5	166	86	51	46
126	2011	b	16.6	8.4	8.1	489	353	146	156
127	2011	a	13.9	8.2	7.7	98	59	28	32
127	2011	b	15.3	8.8	7.8	64	22	15	17
128	2011	a	8.9	8.8	5.5	89	31	42	22
128	2011	b	11	8.7	6.6	37	15	16	11
129	2011	a	17.5	13.4	8.1	62	10	20	9
129	2011	b	15	13.4	6.6	195	64	78	60
130	2011	a	18	10.1	8.5	68	26	24	17
130	2011	b	15.8	9.9	9.6	97	47	31	22
131	2011	a	16.4	7.4	8.6	216	91	76	54
131	2011	b	16.6	9.6	8.4	76	48	26	26
132	2011	a	14	7.3	6.6	68	64	26	32
132	2011	b	14.2	6.6	6.4	194	145	68	62
133	2011	a	13.3	7.2	5.6	32	18	18	13
133	2011	b	20.4	7.1	7	98	84	28	62
134	2011	a	13.3	10.5	9.9	138	78	40	36
134	2011	b	19.7	11.8	10.1	168	153	54	71
135	2011	a	16.7	8.4	9	225	155	72	87
135	2011	b	16.8	9.3	6.9	405	215	121	96
136	2011	a	18.7	18.2	12.3	316	214	89	65
136	2011	b	15.6	14.2	9.6	231	139	68	46
137	2011	a	14.9	12.7	8.1	378	158	130	71
137	2011	b	15.9	14.2	11.2	322	91	96	47
138	2011	a	18.1	11.4	11.5	140	78	48	36
138	2011	b	15.8	8.5	8.2	181	174	59	69
139	2011	a	17.4	10.7	9.2	69	49	23	36
139	2011	b	16.1	8.3	8.1	77	67	23	35
140	2011	a	15.9	13.3	8.3	320	125	100	71
140	2011	b	10	9.1	6.3	331	127	109	60
141	2011	a	13.1	10.5	8.5	306	151	116	88
141	2011	b	12.8	9.6	7.7	91	56	32	36
142	2011	a	24.1	13	10.9	312	142	104	82
142	2011	b	22	13.4	10	200	66	62	40
143	2011	a	11.3	10.8	8	94	52	34	28
143	2011	b	22.7	13.5	10	134	125	47	53
144	2011	a	14.3	11.2	8.4	293	97	87	51
144	2011	b	16.5	11.3	9.5	224	81	88	51
145	2011	a	17.2	14.9	9.1	187	85	56	41
145	2011	b	19.2	8.4	10.5	251	85	83	46
146	2011	a	12.8	10	7.1	54	45	14	26
146	2011	b	18.8	8	7.4	71	56	19	34
147	2011	a	17.9	13.3	7.7	241	62	77	50
147	2011	b	16	10.4	7.7	62	24	17	19
148	2011	a	9	10.2	7.5	187	118	56	49
148	2011	b	16.5	6.9	7.2	198	104	67	48
149	2011	a	18.4	10.8	8	393	133	119	62
149	2011	b	16.3	14.4	10.8	278	80	80	37
150	2011	a	18.5	14.2	13.4	130	53	48	30
150	2011	b	15.8	9.9	7.4	77	31	30	23
151	2011	a	12.7	12.2	7.8	254	79	78	35
151	2011	b	10.9	11.4	7.9	60	20	20	12
152	2011	a	14	8.1	5.1	128	94	47	53
152	2011	b	8.9	7.6	6.1	138	98	45	42
153	2011	a	NA	NA	NA	132	51	36	31
153	2011	b	15.8	10.9	10.3	136	65	50	39
154	2011	a	15.3	8.3	7.3	88	26	26	23
154	2011	b	20.4	10.5	10.3	184	102	54	53
155	2011	a	11.4	10.5	9	108	39	38	26
155	2011	b	12	9.4	7.6	43	24	16	14
156	2011	a	14.9	12	9.2	214	96	59	35
156	2011	b	11.6	9.7	7.1	499	260	140	84
157	2011	a	11.8	7.7	8.5	69	103	19	37
157	2011	b	16.3	7.4	8.6	83	116	28	42
158	2011	a	15.5	11.7	6.4	250	178	79	68
158	2011	b	14.8	10.8	6.6	517	334	143	120
159	2011	a	17.2	10.9	6.6	298	181	93	84
159	2011	b	13.2	9.8	5.6	222	164	72	67
160	2011	a	12.8	11.1	7.2	99	38	31	17
160	2011	b	9.7	8.2	5.6	255	88	86	39
161	2011	a	15	10.9	6.6	179	65	68	38
161	2011	b	15.3	10.8	6.6	233	81	87	43
162	2011	a	11.9	7.2	6.4	66	37	17	33
162	2011	b	16.6	6.6	7.7	69	37	23	27
163	2011	a	20.2	8	7.7	114	89	41	47
163	2011	b	15.3	9.7	7.5	62	39	37	35
164	2011	a	12.7	10.2	7.4	86	35	32	28
164	2011	b	13	9.3	7.1	126	58	54	37
165	2011	a	15.4	13.1	8.4	177	54	54	25
165	2011	b	16.5	12.2	8.9	249	75	77	36
166	2011	a	9.7	10	6	106	58	38	37
166	2011	b	16.9	6.9	6.8	166	76	58	40
167	2011	a	10.8	6.4	6.1	106	47	39	32
168	2011	a	11.3	12.4	12.2	212	95	66	45
168	2011	b	14.9	9.6	6.9	648	360	197	143
169	2011	a	15.2	11.3	8.5	457	177	122	100
169	2011	b	25.3	14.6	12.4	394	101	109	66
170	2011	a	13.3	12	7.2	96	58	41	35
170	2011	b	11.7	6.3	6	33	23	16	18
171	2011	a	17.3	15.8	10.1	192	58	50	34
171	2011	b	20.1	13.4	12.2	183	69	34	57
172	2011	a	13.7	7.3	6.5	106	63	22	28
172	2011	b	18.2	8.7	8.4	60	49	19	25
173	2011	a	14.5	11.9	7.7	706	154	228	106
173	2011	b	13.2	9.4	5.7	535	91	163	66
174	2011	b	14.1	8.1	8	37	14	11	12
175	2011	a	13.1	13.1	9.1	859	367	266	154
175	2011	b	13.4	12.7	8.5	362	196	116	84
176	2011	a	14.7	6.8	6.2	122	49	33	33
176	2011	b	12.7	6.8	7.2	27	16	8	11
177	2011	a	11.4	11.8	7.8	1458	535	443	202
177	2011	b	13.4	10.2	7.5	1100	334	299	122
178	2011	a	9.8	6.3	5.5	154	112	43	46
178	2011	b	20.5	8.9	8.4	227	140	67	65
179	2011	a	17.7	7.9	6	27	19	12	14
179	2011	b	15.3	7.2	5.4	42	26	19	24
180	2011	a	16.1	14.4	8.8	167	62	59	40
180	2011	b	18.8	10.5	9.7	270	158	104	78
181	2011	a	15.4	12.4	7.9	138	38	47	28
181	2011	b	13.6	8.2	5.8	228	77	72	56
182	2011	a	16.9	14.6	8.1	260	106	92	60
182	2011	b	13.3	9.9	7	96	58	40	34
183	2011	a	19.7	9.8	8.8	60	21	16	20
183	2011	b	20.8	7.2	7.9	71	36	23	30
184	2011	a	15.1	6.7	3.1	621	312	193	127
184	2011	b	NA	NA	NA	NA	NA	NA	NA
185	2011	a	15.9	14.8	10.7	173	104	52	41
185	2011	b	15	11.9	9	141	60	42	28
186	2011	a	19	9.3	6.7	136	92	40	46
186	2011	b	18.3	9.3	7.2	136	68	43	34
187	2011	a	17.8	10	8.4	262	217	80	92
187	2011	b	13.6	8.3	7.3	243	108	76	71
188	2011	a	14.9	11.5	8.2	84	34	26	21
188	2011	b	18.5	12.3	8.3	179	59	NA	NA
189	2011	a	17.8	13.1	8.7	472	247	180	125
189	2011	b	15.8	12.7	7.5	342	192	123	97
190	2011	a	18.6	12.3	10	132	71	45	46
190	2011	b	17	12.2	9	89	59	29	30
191	2011	a	15.3	15.8	9.7	503	207	144	82
191	2011	b	15.4	13.4	8	212	120	67	48
192	2011	a	7.8	5.1	4.2	51	37	10	12
192	2011	b	6.2	4.7	3.9	111	52	34	26
193	2011	a	15.2	9.2	8.5	82	42	35	23
193	2011	b	15.3	9.2	8.5	354	272	116	106
194	2011	a	10.5	6.9	6.2	97	49	40	22
194	2011	b	11.5	7.9	7	73	35	30	17
195	2011	a	11.5	12.1	7.3	119	103	41	44
195	2011	b	13.8	7.9	7.3	126	76	39	35
196	2011	a	12.5	9.9	6.2	71	33	24	25
196	2011	b	14	9.1	6.1	48	41	22	32
197	2011	a	14.6	12.1	8.5	184	51	54	28
197	2011	b	15.4	13	7.8	196	59	56	35
198	2011	a	18.8	15.8	9.5	487	245	165	109
198	2011	b	19.2	15.6	8.4	658	225	219	104
199	2011	a	13.8	10	6.8	364	180	118	70
199	2011	b	13.9	10.4	7.4	263	123	85	53
200	2011	a	14.4	10.4	6.6	239	88	103	41
200	2011	b	16	12	8.4	302	145	77	72
201	2011	a	14.5	7.8	7.8	103	41	42	30
201	2011	b	13.8	8.3	6.9	38	21	16	16
202	2011	a	16.8	10.2	7.2	275	195	72	74
202	2011	b	10.5	4.5	4.6	133	106	36	44
203	2011	a	19.5	8.6	7.8	221	172	54	75
203	2011	b	16.7	7.7	6.6	200	91	60	41
204	2011	a	19.3	10.5	9.2	130	107	42	51
204	2011	b	17.5	7.4	8.1	59	28	21	24
205	2011	a	17.6	8.3	7.6	149	124	50	78
205	2011	b	13.5	6.8	5.8	141	123	52	64
206	2011	a	18.4	10.2	9.9	79	39	31	25
206	2011	b	11.7	9.5	9.2	53	40	21	24
207	2011	a	13	12.8	8.3	231	107	82	68
207	2011	b	15.5	13.5	7.3	149	82	53	48
208	2011	b	21.6	9.9	8.8	115	59	43	34
209	2011	a	NA	NA	NA	NA	NA	NA	NA
209	2011	b	NA	NA	NA	NA	NA	NA	NA
210	2011	a	13.3	7.9	7.8	37	32	13	17
210	2011	b	11.4	6.9	7.7	77	45	30	25
211	2011	a	11.3	9.3	8.1	99	55	34	38
211	2011	b	19.3	13.7	9.1	195	116	69	66
212	2011	a	16.4	9.4	9.6	222	142	67	62
212	2011	b	10.8	7.7	7.3	109	63	26	24
213	2011	a	18.4	13	10	374	162	116	96
213	2011	b	NA	NA	NA	NA	NA	NA	NA
214	2011	a	9.7	5.6	5.2	60	43	21	26
214	2011	b	10	6.8	5.4	63	24	19	16
215	2011	a	10.8	9	6.9	91	48	26	27
215	2011	b	14.6	9	8	86	37	24	31
216	2011	a	14	10.5	7.9	103	51	65	31
216	2011	b	14.1	12	8.8	97	42	32	28
217	2011	a	13.8	6	6.1	14	7	5	6
217	2011	b	13	7.4	7	17	7	6	6
218	2011	a	18.8	11.8	7.6	303	175	98	71
218	2011	b	18.4	13	7.4	172	87	51	46
219	2011	a	15.1	13.9	11.8	518	105	159	75
219	2011	b	15	15.7	12.8	220	81	70	44
220	2011	a	11.8	8	7	67	70	22	28
220	2011	b	10.3	7.5	6	49	45	17	21
221	2011	a	14.1	10.2	7.8	204	73	79	44
221	2011	b	14	8.2	7.5	31	13	17	12
222	2011	a	7.9	3	3.2	189	135	52	57
222	2011	b	10.4	9	7.2	210	140	69	57
223	2011	a	13.3	8.4	7.9	135	51	35	27
223	2011	b	12.5	5.8	5.8	52	45	18	23
224	2011	a	17.9	13.7	7.6	1007	526	305	193
224	2011	b	12.5	8.5	5.7	529	230	178	91
225	2011	a	18.6	10.5	7.2	176	210	63	85
225	2011	b	18.8	8.7	8.1	316	276	113	108
226	2011	a	21.8	10.8	8.9	172	116	54	56
226	2011	b	14.5	8.8	7.2	83	41	24	25
227	2011	a	13.9	6.9	6.1	85	36	20	28
227	2011	b	13.8	6.9	6.5	42	18	12	14
228	2011	a	19	10.2	9.2	102	86	29	38
228	2011	b	15.6	9	7.4	80	72	27	30
229	2011	a	11.6	9.8	7.5	156	68	52	39
229	2011	b	13.3	11.1	7.8	93	59	39	36
230	2011	a	11.5	7.6	6.8	78	83	25	32
230	2011	b	12.7	7.1	6.5	119	106	32	38
231	2011	a	11.6	6.4	6	41	38	15	19
231	2011	b	12.5	8.8	7.4	98	42	34	29
232	2011	a	19.6	16.2	10.6	314	265	89	103
232	2011	b	16.9	13.7	10	198	160	56	63
233	2011	a	11.4	9.9	6.9	355	130	112	64
233	2011	b	12.3	11.7	8.4	209	95	69	49
234	2011	a	19	14.9	9.6	209	71	62	43
234	2011	b	13.3	14.4	7.7	120	43	35	23
235	2011	a	15.4	11.5	8.8	89	39	30	34
235	2011	b	16.6	13.1	7.1	250	90	97	53
236	2011	a	18.5	9.2	7.4	145	75	48	46
236	2011	b	14.5	8.4	7.1	78	40	26	29
237	2011	a	12.6	9.6	10.3	432	170	119	80
237	2011	b	16	16.2	8.6	348	215	95	77
238	2011	a	14.3	7.5	6.4	120	119	40	62
238	2011	b	16.1	10.9	6.2	461	325	162	140
239	2011	a	15.4	13.2	9.4	254	111	78	52
239	2011	b	15.3	11.3	8.6	112	43	37	27
240	2011	a	15.2	9.7	9.4	102	83	31	36
240	2011	b	16.9	9.8	9.8	172	104	54	53
241	2011	a	19.1	11.8	9.9	228	181	74	77
241	2011	b	12.6	7	6.2	118	75	43	42
242	2011	a	14	8.6	7.4	102	59	41	32
242	2011	b	9.7	7.6	5.7	71	37	30	23
243	2011	a	15.9	14	9.5	371	177	108	80
243	2011	b	16.7	17	10	227	94	60	37
244	2011	a	17.4	10	9.6	98	141	33	63
244	2011	b	15.9	9.4	9.3	63	40	21	24
245	2011	a	17.1	10.3	7.2	263	183	77	80
245	2011	b	21.4	9.8	8.2	231	105	70	47
246	2011	a	15	7.4	6.6	28	12	10	9
246	2011	b	16.6	6	9	78	38	24	33
247	2011	a	15.1	11.9	7.5	645	200	190	115
247	2011	b	16.3	11.9	8.3	629	321	198	153
248	2011	a	17	13.8	7.2	145	63	40	28
248	2011	b	8.9	9.5	8	101	78	35	34
249	2011	a	16.9	9.9	8.1	83	132	26	48
249	2011	b	15.3	8.6	6.7	147	130	45	52
250	2011	a	20.7	9.8	9.3	119	99	34	35
250	2011	b	15.9	7.8	7.2	83	76	26	28
251	2011	a	11.6	9	8.2	81	51	29	21
251	2011	b	21	10.7	10.5	75	121	23	46
252	2011	a	18.6	11	9.1	644	355	161	159
252	2011	b	NA	NA	NA	NA	NA	NA	NA
253	2011	a	15	4.3	3.2	290	96	102	60
253	2011	b	19.5	10.4	6.4	242	68	83	40
254	2011	a	13.5	8.9	6.4	223	72	73	32
255	2011	a	11.8	9.5	6.1	124	73	38	32
255	2011	b	13.6	8.9	6.7	61	37	20	18
256	2011	a	14.6	12.8	8	128	61	46	38
256	2011	b	15.5	13.1	8.9	175	82	63	49
257	2011	a	19.2	9.3	8.3	123	91	46	48
257	2011	b	17.2	7.9	8	71	34	29	22
258	2011	a	15.2	10.3	6.1	130	38	36	24
258	2011	b	14	9.4	6.1	61	19	20	15
259	2011	a	18	15.4	11.1	268	134	81	56
259	2011	b	12	8.8	8.2	53	15	14	13
260	2011	a	14.1	9.6	7.5	240	150	77	61
260	2011	b	11.8	7.7	6.1	158	82	49	38
261	2011	a	16.2	8.5	7.3	191	84	67	54
261	2011	b	17.2	10.2	7.7	164	74	60	42
262	2011	a	15.9	10.3	8.1	244	138	81	64
262	2011	b	14.2	5.4	4.9	15	43	9	21
263	2011	a	16.1	11.2	8.5	384	110	138	67
263	2011	b	10.8	8	5.8	256	77	90	47
264	2011	a	16.6	12	8.4	306	119	113	70
264	2011	b	13.4	9.5	6.8	105	48	37	28
265	2011	a	15	8.1	7	52	46	15	23
265	2011	b	11.4	7.1	6.3	40	47	12	22
266	2011	a	11.1	5.8	6	94	64	37	44
266	2011	b	11.4	8.3	6.5	82	34	34	23
267	2011	a	10.8	7	7.6	55	15	19	14
267	2011	b	8.3	5.9	5.8	106	42	40	27
268	2011	a	11.5	10	6.4	83	14	26	10
268	2011	b	12.7	8.8	5.8	119	22	32	16
269	2011	a	15.5	11.5	8.8	235	119	75	62
269	2011	b	11.5	8.9	6.8	75	45	27	29
270	2011	a	16.2	8.3	7.4	137	90	45	44
270	2011	b	12.6	5.8	4.8	187	122	59	58
271	2011	a	10.1	4.2	5.1	31	51	11	24
271	2011	b	12.7	5.7	5.8	67	91	26	54
272	2011	a	17.6	13.2	10.6	168	69	56	44
272	2011	b	13	9	6.6	81	22	24	15
273	2011	a	21.6	14.7	10.9	238	240	75	80
273	2011	b	20.4	10.4	8.9	157	105	49	45
274	2011	a	15.8	9.9	7.2	184	84	58	38
274	2011	b	14.9	11.9	9.3	105	65	29	28
275	2011	a	16.8	13.8	8.2	360	141	130	60
275	2011	b	18.3	13.8	8.5	263	88	89	52
276	2011	a	20	16.1	10.8	193	101	66	53
276	2011	b	22.3	20.2	12.5	388	163	121	85
277	2011	a	10.8	5.1	4.5	24	26	9	16
277	2011	b	12	6.7	5.3	35	29	14	16
278	2011	a	22.5	10	8.1	134	93	46	49
278	2011	b	17.7	10.7	8.3	88	49	29	28
279	2011	a	16.1	10.6	8.1	91	109	25	45
279	2011	b	14.2	9.9	7.3	79	47	20	21
280	2011	a	11.3	12	8.7	246	230	73	85
280	2011	b	11.6	6.6	6.3	280	174	78	75
281	2011	a	16.2	11.8	7.2	816	371	245	168
281	2011	b	NA	NA	NA	NA	NA	NA	NA
282	2011	a	15.4	13	9.5	126	55	37	34
282	2011	b	9.6	5.9	6.7	62	10	11	9
283	2011	a	17.5	13.8	8.8	528	206	172	82
283	2011	b	19	16.8	12	286	157	85	58
284	2011	a	17.2	11	7.2	127	76	44	45
284	2011	b	15	9.9	6	87	56	30	32
285	2011	a	13.7	7.9	7.4	79	45	23	32
285	2011	b	11	7.1	5.7	98	43	28	31
286	2011	a	15.7	8.8	6	33	22	12	18
286	2011	b	13.8	6.3	6.1	23	14	8	10
287	2011	a	14.5	8.9	8.9	118	88	36	41
287	2011	b	14	7.7	6.1	102	87	38	42
288	2011	a	7.2	8	6	79	60	22	24
288	2011	b	12.1	10.3	7.2	64	30	18	17
289	2011	a	18.1	8.6	7.9	111	153	40	63
289	2011	b	18.9	8.6	8.1	116	130	42	57
290	2011	a	21.2	11.2	7.7	143	279	35	75
290	2011	b	21	12.8	7.3	93	142	24	45
291	2011	a	9	7.9	6.3	436	150	133	95
291	2011	b	15.6	12.8	7.3	104	56	38	39
292	2011	a	13.9	10	7.8	49	26	16	17
292	2011	b	13.8	7.2	6.4	27	20	13	18
293	2011	a	16.4	6.6	6.8	99	26	40	21
293	2011	b	14.9	8.5	6.3	131	30	57	26
294	2011	a	9.7	8.3	6.3	67	29	21	17
294	2011	b	7.4	5.1	4.3	20	10	5	6
295	2011	a	14.4	9.4	10.1	62	112	40	19
295	2011	b	18.5	10.6	11.7	54	64	13	24
296	2011	a	22.6	10.2	8.2	224	208	65	76
296	2011	b	14.7	8	5.1	82	116	24	45
297	2011	a	13.5	6.7	5.9	107	199	58	74
297	2011	b	19.1	9.9	6.7	216	258	107	94
298	2011	a	14.7	7.6	7.3	99	54	30	23
298	2011	b	13.2	5.8	6.1	76	78	23	29
299	2011	a	19	14	9.3	675	205	203	117
299	2011	b	19.2	14.8	9.5	913	336	276	158
300	2011	a	15.6	6.5	6	206	168	46	93
300	2011	b	NA	NA	NA	NA	NA	NA	NA
301	2011	a	16.8	13.5	9	154	67	53	43
301	2011	b	16.9	13.3	7.9	171	101	60	59
302	2011	a	15.5	9.4	6.1	153	78	43	53
302	2011	b	14.2	7.4	7.2	136	89	35	44
303	2011	a	9.6	6	5.3	80	79	32	37
303	2011	b	10.6	6.5	5.7	88	76	33	41
304	2011	a	20.4	8.3	6.4	50	27	15	20
304	2011	b	NA	NA	NA	NA	NA	NA	NA
305	2011	a	22.8	9.8	8.9	186	209	45	73
305	2011	b	25.6	19.4	11	202	162	54	87
306	2011	a	11.5	7.2	6.9	28	43	8	17
306	2011	b	13.3	6.4	6	41	61	11	21
307	2011	a	11	7	7.4	50	19	14	14
307	2011	b	15.5	7.9	7.5	77	44	22	30
308	2011	a	12.6	5.8	4.9	206	124	76	63
308	2011	b	20.9	8.8	8	191	110	63	50
309	2011	a	18.3	7.9	6.7	195	172	61	72
309	2011	b	18.3	10.6	8.4	179	204	64	68
310	2011	a	15.9	7.7	6.6	120	47	46	38
310	2011	b	11.6	7.5	6.2	172	79	64	52
311	2011	a	18.3	10.2	10.8	472	270	137	123
311	2011	b	14.3	8.7	7.1	180	117	60	57
312	2011	a	17.9	13.9	9.6	578	278	186	129
312	2011	b	15.2	14.1	9.1	254	81	73	44
313	2011	a	17.2	14.8	8.6	173	170	63	64
313	2011	b	18.9	12	8.3	295	163	106	67
314	2011	a	15.3	8.7	5.7	212	185	98	67
314	2011	b	20.3	15.8	11.2	172	79	41	47
315	2011	a	19.9	10.1	9.6	125	125	34	49
315	2011	b	11.2	5.9	5.3	31	34	8	17
316	2011	a	11.2	8.9	5.9	428	244	167	95
316	2011	b	12.4	9.1	6.9	443	274	NA	NA
317	2011	a	18.3	8.6	7.2	215	315	61	121
317	2011	b	18.5	7.7	7.9	152	153	46	71
318	2011	a	15.8	8.3	7.1	256	226	78	96
318	2011	b	20.1	9	8	232	157	79	71
319	2011	a	13.9	11.7	5.6	800	276	242	172
319	2011	b	16.3	10.9	6.6	546	180	170	115
320	2011	a	14	7.3	6.4	258	161	74	70
320	2011	b	21.6	8.1	8.2	78	54	27	39
321	2011	a	10.7	6	5.2	76	49	24	26
321	2011	b	NA	NA	NA	NA	NA	NA	NA
322	2011	a	13.6	7.8	6.2	61	77	19	29
322	2011	b	11.5	6.3	4.9	52	100	15	35
323	2011	a	16.2	12.9	8.4	191	234	56	89
323	2011	b	13.7	9.5	7.7	145	131	46	53
324	2011	a	18.1	12.9	8.1	366	199	133	94
324	2011	b	14.7	13	8.2	79	36	27	25
325	2011	a	19.3	10.7	10.3	336	225	109	107
325	2011	b	20.7	13.2	9.6	225	196	78	89
326	2011	a	21.3	8.7	8.1	249	406	134	137
326	2011	b	19.1	8.8	8.3	142	268	66	84
327	2011	a	15.6	9.1	7.4	206	245	58	93
327	2011	b	12.2	8	6.8	216	222	64	91
328	2011	a	12.5	9.9	6.8	149	46	44	22
328	2011	b	12.5	8.6	7.6	182	82	51	37
329	2011	a	9.3	8.3	6.5	66	43	25	28
329	2011	b	12.9	7.7	7.1	49	21	10	18
330	2011	a	12.9	10.1	7.7	185	96	48	41
330	2011	b	12.3	10.4	7.6	289	84	83	41
331	2011	a	18.7	10.4	9.1	113	95	24	31
331	2011	b	20.1	11.5	9.7	142	97	35	37
332	2011	a	8.4	7.8	6	39	33	15	15
332	2011	b	8.8	5.2	5.7	28	18	9	10
333	2011	a	19.5	18	9.7	384	312	91	94
333	2011	b	12.9	9	6.7	79	46	22	20
334	2011	a	17.6	8.8	7.9	369	245	97	97
334	2011	b	15.7	7.6	6.6	198	245	52	84
335	2011	a	25.1	12.1	11.6	139	134	40	52
335	2011	b	20.9	12.8	10	346	360	117	124
336	2011	a	16.9	9.8	8.1	320	206	90	77
336	2011	b	18.3	9.3	7.4	201	217	57	70
337	2011	a	18.3	13.2	9.3	502	256	160	117
337	2011	b	13.5	11.6	8.5	305	146	101	70
338	2011	a	14.9	7	5.6	67	86	19	27
338	2011	b	16.7	6.6	6	80	83	22	28
339	2011	a	23.3	11.5	7.4	78	35	24	23
339	2011	b	15.8	8.2	3.8	61	28	20	18
340	2011	a	8.7	5.7	5.6	19	43	7	14
340	2011	b	8.8	4.5	4.4	22	42	6	14
341	2011	a	19.3	8.2	5.8	115	155	40	51
341	2011	b	20	8.9	7.1	112	103	43	41
342	2011	a	16.4	6.3	4.8	117	150	30	51
342	2011	b	15.2	8.1	5.7	585	583	214	183
343	2011	a	NA	NA	NA	NA	NA	NA	NA
343	2011	b	NA	NA	NA	NA	NA	NA	NA
344	2011	a	15.4	14.8	8.3	249	73	87	45
344	2011	b	15.5	14.2	8.2	246	83	89	46
345	2011	a	14.4	8.3	6.6	77	48	23	25
345	2011	b	14.4	9.3	5.9	42	24	16	17
346	2011	a	16.4	9.5	7.8	296	137	121	98
346	2011	b	15.2	8.5	6.9	203	138	74	77
347	2011	a	9.9	6.3	5.5	38	53	15	19
347	2011	b	21.2	12.1	12.1	73	48	24	20
348	2011	a	11.8	10	7.2	244	184	71	69
348	2011	b	15.4	7.8	7.4	471	317	123	126
349	2011	a	22.9	8.4	7.6	230	254	66	93
349	2011	b	13	6.3	4.8	59	74	20	29
350	2011	a	18	9.2	7.9	176	114	57	63
350	2011	b	10.8	5.1	4.1	96	89	27	41
351	2011	a	10.4	6.7	5.9	75	49	21	24
351	2011	b	7.5	5.5	4.9	69	55	20	21
352	2011	a	14.4	7.1	7.8	172	113	54	69
352	2011	b	NA	NA	NA	NA	NA	NA	NA
353	2011	a	11.5	7.9	6.6	57	49	16	19
353	2011	b	15.8	9.2	7.7	48	46	12	18
354	2011	a	10.1	8	6.5	201	91	71	49
354	2011	b	15.8	9.6	8.7	129	72	43	43
355	2011	a	15.7	12.9	10.1	518	176	170	76
355	2011	b	13.3	10.8	7.5	246	111	72	52
356	2011	a	12.5	8.9	6.2	241	138	89	73
356	2011	b	10.1	8	6.1	119	68	40	34
357	2011	a	10.4	8.9	7.7	175	142	53	49
357	2011	b	6.6	3.3	2.8	30	29	11	13
358	2011	a	14.5	6	5.8	40	39	17	12
358	2011	b	24.9	17	10	153	110	42	40
359	2011	a	15.9	7.9	5	69	32	19	20
359	2011	b	6.2	3.7	3.1	42	10	6	6
360	2011	a	12.4	7.3	6.5	123	63	44	40
360	2011	b	12.2	7.5	6.9	43	23	14	17
361	2011	a	18.6	9.4	9.4	91	63	35	38
361	2011	b	NA	NA	NA	NA	NA	NA	NA
362	2011	a	11.1	13.1	7.2	78	51	28	28
362	2011	b	10.9	7.5	6.8	41	40	17	24
363	2011	a	19	8.2	6.9	305	453	85	158
363	2011	b	17.2	7.6	5.9	191	369	57	120
364	2011	a	17.5	11.4	10	545	243	171	133
364	2011	b	15.9	12.4	9.2	377	156	126	86
365	2011	a	10.6	6.7	6.4	134	90	35	44
365	2011	b	15.5	7.6	7.1	149	118	43	59
366	2011	a	16.3	11.3	7.7	102	118	34	49
366	2011	b	9.8	3.7	3.5	24	36	8	12
367	2011	a	10	7.7	7.5	72	21	16	14
367	2011	b	13.6	7.5	7	97	36	36	27
368	2011	a	15.8	7.4	7.7	38	15	15	14
368	2011	b	21.5	11.6	9.2	129	27	36	25
369	2011	a	17.1	11.1	7.8	503	247	180	100
369	2011	b	15.1	11.4	7.5	301	121	105	56
370	2011	a	12.8	7.3	5.7	310	200	113	77
370	2011	b	21	12.5	11.7	160	57	55	30
371	2011	a	17.2	14.1	8.6	411	251	128	105
371	2011	b	13.1	8	5.5	147	80	42	40
372	2011	a	9.3	6.1	5.2	378	275	141	123
372	2011	b	12.5	6.9	6.3	282	273	105	104
373	2011	a	19.1	7	7.4	54	29	17	24
373	2011	b	15.1	7.2	5.9	64	42	24	26
374	2011	a	8.6	6.7	6	17	17	5	9
374	2011	b	15.2	6.5	9	35	23	11	13
375	2011	a	21.5	16.7	9.2	223	290	62	102
375	2011	b	14.9	8.3	8	113	153	28	51
376	2011	a	16.5	12.5	8.8	94	22	27	19
376	2011	b	14.2	11.2	7.1	57	10	12	9
377	2011	a	6.7	4.6	4.2	56	24	25	20
378	2011	a	12.1	7.9	6	189	137	59	62
378	2011	b	18	11.6	8.5	195	109	61	57
379	2011	a	10	8.6	5.3	153	65	50	31
379	2011	b	8.9	6.6	5.5	135	58	31	29
380	2011	a	12.9	9.4	6.8	216	108	80	64
380	2011	b	14.4	11.2	7.7	169	66	63	40
381	2011	a	9.8	7.9	6.3	70	23	23	13
381	2011	b	8.6	6.9	5.7	93	43	30	18
382	2011	a	13.8	7.1	5.9	20	16	7	11
382	2011	b	14.3	6.6	6.1	61	105	20	39
383	2011	a	8.6	5.1	4.3	55	26	19	15
383	2011	b	20.3	11.7	9.7	59	27	20	16
384	2011	a	13.2	7.7	7.6	38	37	10	14
384	2011	b	11.5	6.3	5.9	76	65	11	23
385	2011	a	5.7	4.4	4.3	98	82	35	37
385	2011	b	11.2	6	5.9	138	71	54	33
386	2011	a	16.4	8.7	7.4	178	168	83	60
386	2011	b	18.5	9.4	5.8	287	192	152	74
387	2011	a	15.8	6.5	7.8	191	150	56	62
387	2011	b	14.8	9.5	6.6	87	79	24	29
388	2011	a	17.7	9.5	9.1	450	411	127	144
388	2011	b	17.3	8.4	8.2	137	113	40	39
389	2011	a	9.1	5.1	4.6	67	36	23	25
389	2011	b	10.7	3.8	3.4	80	46	27	31
390	2011	a	15.2	11.2	8.8	98	72	34	36
390	2011	b	15.7	9.5	6.5	108	64	38	31
391	2011	a	17.2	8.7	8	168	174	47	56
391	2011	b	15	7.5	5.7	189	196	58	72
392	2011	a	16.4	12.3	8.8	197	67	53	36
392	2011	b	19.5	13	8.5	214	116	53	51
393	2011	a	16.1	7.9	7.6	71	36	19	15
393	2011	b	15.5	6.2	5.9	56	50	12	19
394	2011	a	13.4	10	7.5	150	59	45	30
394	2011	b	14.1	11.1	7.6	379	182	119	79
395	2011	a	17.9	7.8	8	113	123	29	43
395	2011	b	15.6	6.8	6.1	49	68	14	24
396	2011	a	11.9	8.2	6.1	65	60	25	30
396	2011	b	8.7	5.5	5.3	82	56	30	27
397	2011	a	11.7	8.8	5.8	360	199	145	100
397	2011	b	10.8	6.7	5.8	296	190	117	88
398	2011	a	18	15.3	9	971	471	296	193
398	2011	b	22.9	18.4	10.9	823	472	271	175
399	2011	a	20.5	13.4	7.9	193	189	69	66
399	2011	b	29.4	25.2	14	376	245	140	96
400	2011	a	9.8	5.8	4.7	167	78	58	41
400	2011	b	17.7	7	5.2	120	74	44	32
401	2011	a	15.9	9.6	9	198	111	64	52
401	2011	b	15.2	9.7	8.9	167	103	53	50
402	2011	a	4.1	2.8	3.2	124	61	38	27
402	2011	b	NA	NA	NA	NA	NA	NA	NA
403	2011	a	19.8	8	7.4	133	99	35	33
403	2011	b	16.3	6.4	6	57	89	13	25
404	2011	a	10.1	5.9	4.5	132	97	45	46
404	2011	b	10.4	6.4	5.1	43	52	12	21
405	2011	a	17.9	12.1	9.6	279	117	125	55
405	2011	b	19.2	10.2	8.2	424	249	163	88
406	2011	a	12.8	5.9	6	26	24	6	13
406	2011	b	NA	NA	NA	NA	NA	NA	NA
1	2012	a	23.27	7.51	6.3	246	276	57	94
1	2012	b	14.37	5.06	5.1	66	75	15	33
2	2012	a	10.95	4.41	4.23	62	19	11	6
2	2012	b	16.15	6.7	6.1	79	33	15	16
3	2012	a	15.53	7.88	7.91	167	162	45	57
3	2012	b	14.76	7.41	7.76	160	161	50	61
4	2012	a	9.78	6.28	5.08	73	57	22	19
4	2012	b	8.26	4.17	3.76	35	30	10	10
5	2012	a	16.54	10.96	6.2	201	47	52	31
5	2012	b	NA	NA	NA	NA	NA	NA	NA
6	2012	a	12.97	6.73	5.04	21	9	6	4
6	2012	b	17.91	7.34	6.38	31	12	9	7
7	2012	a	9.81	5.79	5.33	85	52	28	30
7	2012	b	9.99	4	3.72	49	22	15	14
8	2012	a	15.36	8.04	7.22	36	55	6	20
8	2012	b	13.28	7.59	6.95	95	104	22	31
9	2012	a	17.93	8.99	8.64	135	75	29	28
9	2012	b	9.55	7.26	5.93	56	42	12	15
10	2012	a	17.2	11.56	7.3	310	192	66	51
10	2012	b	14.04	10.1	7.6	239	228	54	58
11	2012	a	14.85	7.85	7.3	74	78	19	30
11	2012	b	19.14	11.03	10.03	120	162	28	48
12	2012	a	19.7	10.36	9.83	132	108	36	41
12	2012	b	16.7	11.26	9.91	133	123	37	43
13	2012	a	20.35	16.43	10.59	309	110	83	57
13	2012	b	13.48	11.27	7.89	261	91	77	41
14	2012	a	12.56	9.73	7.59	344	162	101	68
14	2012	b	12.01	8.26	7.38	203	88	73	40
15	2012	a	18.87	12.19	9.16	265	159	75	64
15	2012	b	14	8.08	7.77	159	88	48	38
16	2012	a	10.56	6.87	5.82	46	23	15	14
16	2012	b	6.39	3.22	3.1	9	4	2	1
17	2012	a	14.85	8.64	8.11	197	233	49	70
17	2012	b	13.79	10.32	7.22	124	61	34	25
18	2012	a	20.04	9.32	9.28	380	133	83	57
18	2012	b	NA	NA	NA	NA	NA	NA	NA
19	2012	a	13.68	7.47	7.25	83	39	17	18
19	2012	b	15.08	8.6	7.73	174	77	35	32
20	2012	a	17.03	9.9	9.25	130	145	31	40
20	2012	b	13.42	9.38	7.05	95	80	23	24
21	2012	a	14.4	8.85	7.94	149	67	49	29
21	2012	b	12.73	8.51	6.12	99	23	27	17
22	2012	a	16.69	8.4	7.6	95	104	22	28
22	2012	b	15.63	8.37	7.95	89	86	18	30
23	2012	a	15.17	12.18	9.08	588	213	153	87
23	2012	b	13.61	11.83	8.23	157	66	43	26
24	2012	a	20.05	11.99	8.11	129	280	34	97
24	2012	b	16.15	9.34	8.64	105	138	24	51
25	2012	a	NA	NA	NA	NA	NA	NA	NA
25	2012	b	NA	NA	NA	NA	NA	NA	NA
26	2012	a	19.29	8.22	7.85	165	223	41	73
26	2012	b	19.68	8.48	8.48	189	147	42	59
27	2012	a	9.66	5.87	5.28	158	93	56	47
27	2012	b	16.52	11.16	7.96	234	118	81	54
28	2012	a	NA	NA	NA	NA	NA	NA	NA
28	2012	b	NA	NA	NA	NA	NA	NA	NA
29	2012	a	16.06	7.37	6.51	171	76	51	47
29	2012	b	12.43	9.56	6.49	121	89	40	36
30	2012	a	13.54	7.93	6.5	262	181	53	47
30	2012	b	14.43	9.27	7	291	120	60	35
31	2012	a	16.55	7.88	6.29	341	216	92	80
31	2012	b	18.62	7.71	7.34	579	265	134	105
32	2012	a	20.94	8.23	6.95	184	172	54	61
32	2012	b	15.09	10.55	5.46	114	100	32	35
33	2012	a	19.94	7.79	7.04	66	31	16	29
33	2012	b	12.59	8.6	7.53	110	93	28	40
34	2012	a	15.32	11.32	8.05	146	117	36	38
34	2012	b	14.27	8.52	9.24	102	81	25	27
35	2012	a	15.02	10.14	8.75	157	121	41	42
35	2012	b	17.6	10.85	8.18	124	117	32	41
36	2012	a	16.11	9.35	6.23	152	87	40	30
36	2012	b	12.57	7.83	6.11	212	149	55	50
37	2012	a	10.01	7.28	4.79	24	29	5	9
37	2012	b	11.75	7.62	6.12	33	38	9	15
45	2012	a	16.65	10.82	11.36	84	94	18	42
45	2012	b	12.07	8.88	7.59	147	74	32	28
46	2012	a	11.74	8.01	6.73	237	156	56	76
46	2012	b	18.34	11.95	8.04	135	105	37	36
47	2012	a	17.9	10.05	8.56	173	167	48	62
47	2012	b	21.79	16.1	10.38	131	158	36	56
48	2012	a	14.7	8.02	7.09	219	142	58	45
48	2012	b	9.39	9	5.57	115	32	33	15
49	2012	a	11.22	8.43	7.14	330	181	68	58
49	2012	b	8.52	6.43	6.21	221	91	46	28
50	2012	a	6.71	7.32	4.95	127	34	30	19
50	2012	b	20.89	15.2	8.6	750	208	170	99
51	2012	a	17.92	10.82	8.27	182	148	47	43
51	2012	b	17.38	10.77	10.72	153	104	31	31
52	2012	a	10.91	6.4	6.23	52	21	14	10
52	2012	b	10.08	5.88	5.38	52	23	15	11
53	2012	a	15.77	8.86	8.04	258	135	73	50
53	2012	b	12.05	8.48	6.93	224	100	61	37
54	2012	a	18.8	10.6	6.58	312	168	88	88
54	2012	b	19.47	10.96	7.87	707	370	213	171
55	2012	a	17.99	14.23	8.64	205	105	48	32
55	2012	b	13.04	13.01	7.8	174	109	42	30
56	2012	a	8.79	5.54	5.36	83	38	28	18
56	2012	b	6.06	5.05	4.46	119	68	41	28
57	2012	a	12.38	7.34	7.19	87	73	23	23
57	2012	b	11.75	8.35	8.31	168	120	43	47
58	2012	a	6.86	3.29	1.87	149	83	31	28
58	2012	b	13.06	8.97	6.44	146	74	38	30
59	2012	a	14.94	8.62	7.98	227	158	50	45
59	2012	b	18.29	8.91	8.51	167	162	41	50
60	2012	a	11.24	7.11	5.74	62	16	15	9
60	2012	b	19.59	10.07	10.42	114	40	21	19
61	2012	a	8.82	6.8	5.22	333	254	116	103
61	2012	b	10.46	5.99	5.51	90	50	33	21
62	2012	a	11.22	7.9	6.28	173	83	52	30
62	2012	b	10.02	6.78	5.56	42	222	13	9
63	2012	a	NA	NA	NA	NA	NA	NA	NA
63	2012	b	NA	NA	NA	NA	NA	NA	NA
64	2012	a	18.96	9.37	8.37	452	140	123	56
64	2012	b	18.31	12.11	7.28	400	152	112	52
65	2012	a	18.05	8.52	7.76	93	73	20	23
65	2012	b	16.4	11.69	8.86	177	92	30	30
66	2012	a	19.77	12.6	10.34	403	174	98	85
66	2012	b	19.63	12.69	9.18	253	181	68	62
67	2012	a	16.6	8.53	7.89	102	85	21	22
67	2012	b	10.2	6.19	5.67	92	93	23	25
68	2012	a	15.24	7.92	7.79	251	86	60	42
68	2012	b	18.47	9.4	8.47	308	219	69	80
69	2012	a	14.94	7.77	7.29	56	61	11	21
69	2012	b	18.86	10.77	9.7	130	145	35	48
70	2012	a	10.15	6.77	6.02	41	14	14	7
70	2012	b	12.81	7.12	5.63	36	5	12	3
71	2012	a	7.94	6.29	6.14	94	67	33	27
71	2012	b	9.6	6.81	6.83	220	85	81	42
72	2012	a	14.24	6.65	6.46	174	146	52	51
72	2012	b	15.32	9.32	9.06	155	94	39	40
73	2012	a	18.24	9.9	8.61	377	415	85	105
73	2012	b	13.65	9.01	7.74	89	98	22	28
74	2012	a	17.57	8.8	8.54	138	111	35	37
74	2012	b	16.67	9.5	8.39	163	87	39	30
75	2012	a	12.65	6.83	5.63	119	137	31	43
75	2012	b	11.59	8	6.13	91	92	25	34
76	2012	a	25.34	13.5	7.78	121	148	30	47
76	2012	b	22.27	9.08	7.76	131	122	31	42
77	2012	a	25.5	10.37	10.32	103	116	23	34
77	2012	b	20.81	9.23	8.28	128	118	27	44
78	2012	a	16.47	9.43	7.97	333	218	94	75
78	2012	b	14.67	10.22	7.23	261	125	78	50
79	2012	a	5.26	4.32	3.26	40	16	14	5
79	2012	b	13.42	7.06	7.37	95	35	30	17
80	2012	a	12.67	8.64	5.47	94	60	32	23
80	2012	b	13.34	7.85	5.56	336	268	108	94
81	2012	a	13.52	7.44	6.56	47	39	13	14
81	2012	b	13.91	7.06	6.63	180	43	39	18
82	2012	a	20.74	10.31	9.84	123	128	26	38
82	2012	b	16.09	8.14	8.18	177	162	39	55
83	2012	a	12.16	9.82	7.13	270	86	79	38
83	2012	b	15.68	11.5	7.73	831	201	157	96
84	2012	a	15.97	7.11	6.27	481	373	151	144
84	2012	b	16.29	10.55	7.03	527	401	164	143
85	2012	a	11.57	7.01	6.48	98	47	24	21
85	2012	b	8.73	6.3	6.02	133	77	37	34
86	2012	a	14.45	8.69	7.25	112	85	23	28
86	2012	b	20.02	10.23	10.94	298	262	61	78
87	2012	a	11.91	9.32	7.86	90	45	29	17
87	2012	b	13.72	8.82	6.83	72	57	23	22
88	2012	a	19.13	14.53	11.16	153	109	44	49
88	2012	b	18.56	9.23	6.02	208	136	72	60
89	2012	a	15.72	8.24	8.11	100	184	22	51
89	2012	b	13.11	6.45	6.42	15	75	2	21
90	2012	a	14.11	7.11	6.56	122	121	33	34
90	2012	b	14.57	6.83	7.32	79	77	19	25
91	2012	a	NA	NA	NA	NA	NA	NA	NA
91	2012	b	NA	NA	NA	NA	NA	NA	NA
92	2012	a	18.35	13.71	8.29	340	243	81	71
92	2012	b	18.73	10.61	8.48	339	175	87	54
93	2012	a	19.78	13.36	8.05	397	230	98	68
93	2012	b	15.76	11.44	8.93	190	75	50	29
94	2012	a	16.93	11.43	9.2	65	44	15	18
94	2012	b	18.22	10.59	10.12	213	125	43	51
95	2012	a	19.66	11.26	8.21	310	307	93	97
95	2012	b	16.12	8.44	7.34	96	103	25	34
96	2012	a	12.73	7.45	5.93	43	37	12	21
96	2012	b	10.9	8.94	7.69	99	59	27	32
97	2012	a	15.89	6.89	5.92	330	132	96	81
97	2012	b	12.31	7.79	5.94	451	175	140	103
98	2012	a	11.87	6.86	5.82	153	63	45	34
98	2012	b	12.58	8.27	6.18	342	90	97	52
99	2012	a	12.84	6.65	6.31	132	81	35	26
99	2012	b	14.11	10.13	7.96	191	108	50	38
100	2012	a	13.53	9.36	7.6	148	66	33	28
100	2012	b	12.89	8.65	6.18	359	123	95	52
101	2012	a	20.42	8.21	8.52	135	224	28	57
101	2012	b	17.97	8.67	8.62	148	135	27	36
102	2012	a	15.31	7.17	5.21	74	72	20	25
102	2012	b	10.48	7.61	6.61	93	54	19	21
103	2012	a	20.83	9.37	7.58	85	116	23	43
103	2012	b	18.26	8.43	6.54	98	97	26	42
104	2012	a	14.42	8.31	7.55	287	234	55	68
104	2012	b	9.94	8.29	5.21	248	144	53	49
105	2012	a	3.05	1.18	0.88	199	120	58	53
105	2012	b	14.26	7.73	7.58	114	71	35	31
106	2012	a	15.79	8.08	7.01	136	74	36	31
106	2012	b	16.03	6.56	6.01	173	80	52	42
107	2012	a	11.13	7.01	6.13	128	105	29	36
107	2012	b	13.35	7.67	6.91	190	152	48	45
108	2012	a	19.1	14.3	8.7	347	53	93	28
108	2012	b	13.83	8.19	6.14	529	165	156	83
109	2012	a	15.06	8.22	6.96	127	109	36	42
109	2012	b	16.84	9.58	8.64	95	108	25	37
110	2012	a	19.14	14.87	10.84	513	259	148	90
110	2012	b	12.85	12.76	9.66	188	105	57	34
111	2012	a	17.67	9.02	7.59	239	88	56	38
111	2012	b	15.37	8.32	6.45	76	39	19	20
112	2012	a	19.8	8.09	7.45	259	171	68	55
112	2012	b	23.54	9.4	8.93	236	160	59	59
113	2012	a	16.81	9.26	8.16	278	166	66	50
113	2012	b	19.92	11.62	9.52	355	218	91	60
114	2012	a	17.4	8.73	8.51	244	171	51	64
114	2012	b	14.51	7.39	7.75	163	131	37	55
115	2012	a	16.83	11.37	7.14	895	431	208	138
115	2012	b	NA	NA	NA	NA	NA	NA	NA
116	2012	a	16.7	6.27	6.2	567	486	152	167
116	2012	b	13.62	8.71	8.27	530	483	119	124
117	2012	a	14.54	10.19	8.91	299	111	71	42
117	2012	b	13.31	9.68	6.81	250	119	58	41
118	2012	a	19.18	13.49	9.83	149	196	42	62
118	2012	b	18.1	10.03	8.8	139	178	38	58
119	2012	a	17.95	9.31	8.68	89	82	18	24
119	2012	b	14.85	9.43	7.15	142	148	35	44
120	2012	a	17.95	9.63	6.9	144	82	40	39
120	2012	b	10.04	7.85	5.88	154	128	41	53
121	2012	a	13.11	9.86	6.62	577	281	163	104
121	2012	b	16.34	11.09	8.78	181	73	38	27
122	2012	a	18.56	10.78	8	101	136	25	44
122	2012	b	17.28	7.16	7.92	78	88	15	28
123	2012	a	12.27	10.27	7.1	193	90	59	42
123	2012	b	13.42	9.67	7.63	394	196	115	82
124	2012	a	15.26	8.43	8.7	400	368	109	108
124	2012	b	15.56	8.47	8.04	232	257	56	69
125	2012	a	15.56	9.98	6.54	1391	513	438	226
125	2012	b	15.68	9.23	8.04	651	248	184	115
126	2012	a	20.04	10.68	10.12	120	84	27	32
126	2012	b	16.11	8.66	8.56	226	147	60	51
127	2012	a	13.93	6.94	6.65	67	36	17	15
127	2012	b	13.72	6.2	5.94	75	35	18	14
128	2012	a	9.57	5.42	4.77	125	51	33	19
128	2012	b	9.75	6.51	5.34	87	49	25	16
129	2012	a	20.31	9.82	5.99	165	40	38	21
129	2012	b	15.5	8.07	4.67	284	79	88	50
130	2012	a	11.59	9.8	7.47	60	38	13	10
130	2012	b	10.96	7.94	7.9	58	52	11	15
131	2012	a	16.71	11.24	8.87	172	143	39	47
131	2012	b	15.07	9.76	9.7	141	120	40	42
132	2012	a	11.11	7.11	5.3	46	78	15	20
132	2012	b	12.17	6.61	5.94	76	99	19	29
133	2012	a	13.09	8.6	7.1	169	162	37	52
133	2012	b	15.16	8.39	6.2	98	64	24	26
134	2012	a	18.26	9.53	9.25	119	141	25	39
134	2012	b	12.12	7.58	6.7	107	162	23	45
135	2012	a	17.78	9.43	9.18	184	107	41	37
135	2012	b	13.32	6.39	5.43	319	176	71	54
136	2012	a	15.16	11.61	8.41	230	101	59	39
136	2012	b	11.79	7.64	7.18	246	75	60	29
137	2012	a	19.95	12.11	8.78	226	169	56	56
137	2012	b	4.98	7.05	7.09	85	91	21	22
138	2012	a	14.52	9.1	7.43	111	81	29	24
138	2012	b	11.69	11.81	7.71	280	156	79	46
139	2012	a	17.51	10.36	8.05	147	100	36	33
139	2012	b	13.96	10.24	8.51	203	191	47	54
140	2012	a	10.8	8.96	6.48	236	136	66	50
140	2012	b	12.68	11.47	6.43	352	194	104	71
141	2012	a	8.25	5.03	7.84	167	130	48	42
141	2012	b	8.57	6.83	6.29	318	181	93	65
142	2012	a	15.23	8.63	7.84	213	108	56	35
142	2012	b	13.43	7.51	7.1	146	64	31	28
143	2012	a	14.79	8.14	7.15	153	80	45	32
143	2012	b	14.59	7.85	7.16	83	43	28	22
144	2012	a	14.8	10.47	7.84	114	59	26	20
144	2012	b	12.86	8.2	6.96	176	96	39	31
145	2012	a	9.74	4.88	4.64	91	43	20	18
145	2012	b	9.77	5.37	5.04	68	40	NA	NA
146	2012	a	17.9	9.66	7.93	94	65	23	31
146	2012	b	11.12	6.11	5.3	65	45	18	25
147	2012	a	16.84	8.42	7.85	66	74	15	23
147	2012	b	16.05	9.99	9.54	186	85	44	34
148	2012	a	17.8	6.79	7.09	132	113	26	44
148	2012	b	17.33	8.5	9	331	171	65	61
149	2012	a	13.76	12.27	10.48	214	106	43	28
149	2012	b	11.95	11.6	8.11	92	44	19	13
150	2012	a	13.17	7.13	7.6	177	130	48	37
150	2012	b	12.8	7.93	6.65	173	103	51	35
151	2012	a	10.59	7.4	6.52	31	9	8	3
151	2012	b	13.44	8.81	7.72	44	11	9	6
152	2012	a	9.61	6.23	4.99	66	49	23	18
152	2012	b	9.83	6.67	5.44	98	28	30	12
153	2012	a	11.53	8.83	6.96	196	155	60	50
153	2012	b	7.71	5.95	5.9	204	128	56	46
154	2012	a	15.99	7.91	7.24	56	29	14	12
154	2012	b	12.79	6.49	6.53	59	11	6	6
155	2012	a	9.95	5.83	5.57	120	82	41	29
155	2012	b	8.95	6.7	5.58	107	68	34	27
156	2012	a	15.38	10.95	8.58	152	62	31	17
156	2012	b	11.12	10.75	7.47	100	70	24	19
157	2012	a	13.07	8.02	8.03	295	237	61	70
157	2012	b	10.35	6.87	6.69	200	207	47	61
158	2012	a	13.91	8.78	6.27	450	200	115	70
158	2012	b	15.41	10.55	8.19	579	321	160	121
159	2012	a	10.41	7.69	5.61	235	89	75	42
159	2012	b	13.2	9.83	6.77	198	90	52	40
160	2012	a	10.16	5.56	6.03	173	90	40	25
160	2012	b	7.21	6.2	3.9	115	51	27	14
161	2012	a	13.55	7.6	7.19	186	102	48	36
161	2012	b	13.88	9.62	6.95	126	80	36	31
162	2012	b	6.68	4.2	4.02	34	19	8	8
163	2012	a	18.69	9.14	8.52	84	57	18	20
163	2012	b	13.17	7.14	6.63	210	146	51	48
164	2012	a	14.35	9.34	8.21	226	131	61	48
164	2012	b	22.46	11.01	11.67	264	129	72	52
165	2012	a	14.15	9.57	8.16	200	96	53	28
165	2012	b	10.7	10	6.02	170	65	51	18
166	2012	a	13.43	6.63	6.18	99	50	26	18
166	2012	b	13.26	9.25	6.11	64	51	18	15
167	2012	a	14.5	10.05	9.57	242	228	60	63
167	2012	b	14.56	10.85	9.75	208	121	52	42
168	2012	a	16.16	8.17	7.49	355	229	102	79
168	2012	b	14.86	7.7	7.47	284	187	63	67
169	2012	a	23.46	10.08	10.41	92	44	20	19
169	2012	b	NA	NA	NA	NA	NA	NA	NA
170	2012	a	12.86	6.24	6.45	121	81	37	42
170	2012	b	12.62	6.81	6.11	64	45	20	24
171	2012	a	14.05	7.5	6.99	182	113	45	40
171	2012	b	10.47	6.76	6.64	149	93	37	36
172	2012	a	21.85	8.99	8.21	173	188	40	57
172	2012	b	14.05	8.01	7.74	108	68	28	43
173	2012	a	16.24	11.13	7.85	597	155	159	68
173	2012	b	11.31	9.66	6.18	632	184	170	75
174	2012	a	11.79	5.99	5.93	36	23	9	10
174	2012	b	14.14	9.23	8.23	441	446	97	134
175	2012	a	11.16	12.26	7.82	271	157	71	52
175	2012	b	15.39	11.23	10.27	672	385	158	94
176	2012	a	13.28	9.34	9.28	111	54	23	18
176	2012	b	13.6	8.87	7.99	158	63	32	27
177	2012	a	13.13	9.17	8.75	170	54	35	24
177	2012	b	11.66	10.67	7.76	630	168	156	66
178	2012	a	18.21	9.55	8.37	162	190	37	49
178	2012	b	19.03	9.32	9.48	109	168	26	39
179	2012	a	14.3	8.67	6.9	74	75	20	24
179	2012	b	16.5	8.23	7.17	29	25	8	8
180	2012	a	17.27	8.9	9.63	235	204	64	80
180	2012	b	18.03	8.75	7.87	204	193	59	66
181	2012	a	16.7	10.22	10	305	128	73	50
181	2012	b	15.48	11.99	9.7	393	248	100	78
182	2012	a	16.77	11.3	8.88	321	160	98	62
182	2012	b	11.22	7.04	6.41	172	85	48	39
183	2012	a	18.31	9.72	8.37	133	104	38	37
183	2012	b	18.06	8.9	7.27	70	36	20	20
184	2012	a	16.05	9.44	7.1	178	123	40	49
184	2012	b	NA	NA	NA	NA	NA	NA	NA
185	2012	a	15.44	12.34	9.02	158	92	43	26
185	2012	b	15.4	14.31	9.78	231	119	52	34
186	2012	a	16.8	10.63	7.34	132	122	30	37
186	2012	b	14.23	8.91	7.98	110	99	30	39
187	2012	a	14.28	8	7.26	136	69	32	25
187	2012	b	16.56	10.82	8.36	340	234	71	75
188	2012	a	9.79	6.45	5.77	84	51	25	18
188	2012	b	14.33	7.98	6.57	262	175	81	67
189	2012	a	15.04	11.36	8.17	248	121	89	58
189	2012	b	17.29	11.43	8.21	256	184	91	73
190	2012	a	15.26	11.53	9.01	154	136	36	41
190	2012	b	14.85	11.54	8.89	200	239	57	71
191	2012	a	15.15	8.18	7.79	324	207	81	64
191	2012	b	13.14	8.57	8	245	83	58	35
192	2012	a	10.87	9.2	6.09	271	147	39	55
192	2012	b	10.28	6.67	5.81	123	93	32	31
193	2012	a	16.18	11.78	8.18	146	140	31	38
193	2012	b	13.79	9.64	8.82	83	74	17	23
194	2012	a	11.44	8.2	6.58	172	137	47	38
194	2012	b	14.15	9.25	8.81	192	140	52	44
195	2012	a	11.77	7.1	6.36	297	204	83	87
195	2012	b	7.19	8.32	5.33	95	81	27	34
196	2012	a	14.36	8.04	7.37	249	259	65	74
196	2012	b	15.05	8.42	9.56	237	187	52	58
197	2012	a	15.34	9.25	6.43	223	118	49	45
197	2012	b	14.99	9.59	9.11	585	226	124	77
198	2012	a	13.2	7.7	7.37	303	167	88	58
198	2012	b	9.83	9.4	6.41	361	172	90	59
199	2012	a	10.18	6.99	5.93	183	54	42	22
199	2012	b	11.9	7.63	6.83	301	126	63	52
200	2012	a	17.51	11.96	8.55	444	258	102	86
200	2012	b	16.13	10.78	8.09	119	85	28	28
201	2012	a	14.72	6.89	7.31	90	68	25	41
201	2012	b	14.15	7.7	6.5	40	54	10	20
202	2012	a	16.44	11.97	10.13	71	76	13	19
202	2012	b	13.39	8.06	7.07	110	80	32	32
203	2012	a	22.38	9.58	8.89	207	281	44	70
203	2012	b	22.29	9.72	8.11	333	291	79	92
204	2012	a	19.89	14.75	8.72	270	243	65	79
204	2012	b	14.46	11.08	9.56	307	233	70	75
205	2012	a	17.56	9.73	6.51	263	301	65	94
205	2012	b	14.97	8.72	8.6	153	142	42	45
206	2012	a	15.58	10.57	9.18	63	46	15	21
206	2012	b	15.09	9.41	7.28	74	82	16	31
207	2012	a	18.96	8.39	8.56	271	187	65	69
207	2012	b	19.75	14.87	9.93	287	205	83	92
208	2012	a	17.1	9.3	8.25	272	143	68	63
208	2012	b	13.86	6.78	5.43	99	58	30	26
209	2012	a	10.44	7.74	6.22	59	13	19	7
209	2012	b	17.57	8.41	8.4	83	22	28	13
210	2012	a	16.04	9.9	10.15	189	105	56	49
210	2012	b	17.72	10.55	10.13	176	186	46	63
211	2012	a	19.74	8.33	8.31	187	291	43	84
211	2012	b	17.86	10.4	10.14	218	181	44	54
212	2012	a	15.3	11.33	9.81	246	212	59	56
212	2012	b	13.48	10.82	9.68	160	118	33	35
213	2012	a	25.63	11.91	10.16	413	446	111	133
213	2012	b	23.76	14.18	12.81	444	254	125	81
214	2012	a	12.73	7.84	7.44	311	143	92	51
214	2012	b	10.17	8.59	6.67	131	61	34	22
215	2012	a	11.51	8.38	7.46	139	92	27	32
215	2012	b	11.64	8.26	8.03	124	162	30	50
216	2012	a	12.96	7.2	8.04	80	74	19	21
216	2012	b	8.95	6.42	5.95	38	30	9	9
217	2012	a	16.38	9.9	9.28	59	42	12	16
217	2012	b	19.28	10.52	9.72	108	50	27	21
218	2012	a	18.08	10.71	7.46	247	125	67	45
218	2012	b	14.25	8.52	6.16	199	130	61	41
219	2012	a	10.63	9.16	8.5	157	39	37	17
219	2012	b	20.33	15.66	16.25	522	172	114	60
220	2012	a	18.43	10.81	8.15	60	83	NA	NA
220	2012	b	19.25	9.31	7.66	221	186	53	53
221	2012	a	18.14	12.29	11.08	208	165	48	48
221	2012	b	13.56	8.69	7.62	91	84	26	22
222	2012	a	14.95	8.57	7.58	218	140	65	43
222	2012	b	10.92	7.07	6.56	80	43	19	15
223	2012	a	14.63	8.41	7.9	188	144	41	45
223	2012	b	12.67	8.85	7.45	312	182	72	63
224	2012	a	21.37	13.23	8.4	376	212	100	69
224	2012	b	18.78	8.92	8.18	346	149	97	54
225	2012	a	22.28	12.26	11.02	95	77	27	34
225	2012	b	24.2	7.8	19.36	214	215	64	76
226	2012	a	16.92	10.06	8.45	298	303	71	87
226	2012	b	13.47	7.97	6.34	88	81	15	24
227	2012	a	13.3	8.78	8.23	106	77	24	26
227	2012	b	16.84	9.49	9.13	146	149	32	47
228	2012	a	15.43	8	8.53	124	102	20	40
228	2012	b	15.05	9.74	9.09	117	116	26	32
229	2012	a	14.94	11.23	7.96	242	189	66	55
229	2012	b	10.52	10.56	8.06	226	134	56	42
230	2012	a	15.12	9.44	8.99	85	69	20	22
230	2012	b	14.84	9.06	8.49	227	144	59	47
231	2012	a	18.2	8.23	8.1	94	52	23	27
231	2012	b	13.46	7.38	7.59	38	67	9	19
232	2012	a	19.23	14.99	11.97	309	147	82	63
232	2012	b	20.85	18.38	9.67	505	255	111	114
233	2012	a	12.72	8.72	7.69	627	328	160	103
233	2012	b	12.37	11.06	8.91	317	170	86	52
234	2012	a	11.04	9.49	6.95	164	139	40	38
234	2012	b	20.85	15.77	10.97	935	508	220	149
235	2012	a	13.97	9.2	7.85	262	117	69	55
235	2012	b	13.29	8.53	6.73	182	48	61	26
236	2012	a	15.71	7.84	7.43	160	130	43	44
236	2012	b	14.09	9.07	7.42	161	77	39	32
237	2012	a	14.93	7.85	7.75	508	295	91	89
237	2012	b	12.14	6.19	5.33	85	53	20	17
238	2012	a	17.97	13.47	8.51	1017	597	291	202
238	2012	b	13.23	10.21	6.1	656	297	180	102
239	2012	a	21.16	16.83	10.55	534	330	125	92
239	2012	b	18.86	13.72	9.04	1102	559	265	154
240	2012	a	17.47	10.84	9.89	245	186	61	63
240	2012	b	16.7	10.27	9.59	250	168	57	64
241	2012	a	15.44	7.81	7.53	73	70	19	23
241	2012	b	11.26	8.18	7.01	64	93	16	27
242	2012	a	11.78	6.42	7.04	117	80	31	28
242	2012	b	8.8	7.68	5.42	233	102	56	40
243	2012	a	21.9	14.75	12.64	429	200	85	69
243	2012	b	14.07	11.21	10.49	206	90	43	32
244	2012	a	11.77	7.54	7.08	211	291	49	79
244	2012	b	15.12	10.02	10.1	418	339	103	98
245	2012	a	16.97	7.78	7.35	172	92	49	41
245	2012	b	15.28	7.89	7.16	451	215	111	84
246	2012	a	18.33	10.22	7.44	133	55	40	23
246	2012	b	16.24	9.41	6.49	194	84	60	30
247	2012	a	18.7	12.6	8.4	407	152	116	65
247	2012	b	15.44	10.68	8.11	293	103	89	46
248	2012	a	17.34	8.58	8.25	259	183	64	61
248	2012	b	21.08	9.9	9.35	376	282	89	87
249	2012	a	18.35	9.61	7.56	208	142	54	52
249	2012	b	18.44	9.78	8.96	157	125	39	43
250	2012	a	14.22	8.18	7.71	318	235	72	66
250	2012	b	15.24	9.44	9.29	245	176	60	45
251	2012	a	20.42	9.9	9	83	108	19	32
251	2012	b	16.47	11.22	9.28	133	174	25	50
252	2012	a	NA	NA	NA	NA	NA	NA	NA
252	2012	b	NA	NA	NA	NA	NA	NA	NA
253	2012	a	18.73	11.4	9.18	282	131	67	43
253	2012	b	17.21	11.09	8.35	385	194	96	64
254	2012	a	11.37	6.83	6.77	73	20	11	6
254	2012	b	10.87	7.34	6.64	72	27	17	13
255	2012	a	15.12	8.08	8.34	89	52	21	18
255	2012	b	18.21	8.22	7.42	112	86	25	33
256	2012	a	13.1	7.76	5.72	50	34	10	8
256	2012	b	13.77	7.79	6.2	116	79	28	29
257	2012	a	15.88	6.9	6.6	78	49	20	20
257	2012	b	16.09	13.66	8.45	201	128	57	44
258	2012	a	18.62	8.17	7.8	558	317	112	95
258	2012	b	13.07	11.54	7.34	393	248	86	71
259	2012	a	13.88	11.41	8.68	192	79	53	34
259	2012	b	13.63	11.18	7.63	228	110	71	51
260	2012	a	11.98	12.68	8.48	124	32	37	27
260	2012	b	12.3	11.93	7.74	199	44	58	24
261	2012	a	16.08	9.77	8.11	400	293	125	96
261	2012	b	17.25	13.21	9.53	849	518	274	174
262	2012	a	19.6	9.13	7.92	671	668	158	184
262	2012	b	20.31	9.39	8.94	824	767	184	207
263	2012	a	13.04	7.58	7.38	175	86	50	39
263	2012	b	8.66	5.4	5.25	82	40	25	16
264	2012	a	12.45	7.14	7.32	222	121	58	49
264	2012	b	14.57	9.09	9.54	193	98	50	43
265	2012	a	15.18	6.63	6.02	63	84	17	25
265	2012	b	12.92	5.94	5.53	81	72	23	27
266	2012	a	11.76	5.68	5.72	86	87	28	39
266	2012	b	12.07	5.9	5.95	45	42	13	20
267	2012	a	10.81	7.56	6.84	140	86	45	35
267	2012	b	13.7	8.06	7.78	195	104	51	39
268	2012	a	12.4	8.18	6.64	63	13	13	9
268	2012	b	11.79	9.86	5.27	66	18	11	5
269	2012	a	14.85	13.65	9.09	224	106	60	49
269	2012	b	13.43	11.85	6.6	298	116	76	51
270	2012	a	18.19	7.84	7.57	241	121	70	51
270	2012	b	12.58	6.99	6.79	125	70	33	26
271	2012	a	13.97	5.76	5.49	104	136	29	52
271	2012	b	15.77	6.65	6.38	183	142	48	61
272	2012	a	15.87	10.83	8.64	677	414	146	106
272	2012	b	17.08	11.73	8.7	881	358	204	100
273	2012	a	15.68	13.03	10.73	98	69	31	32
273	2012	b	10.36	6.31	6.01	67	64	23	26
274	2012	a	18.71	14	8.04	383	218	99	70
274	2012	b	15.65	14.87	8.85	283	150	69	50
275	2012	a	17.06	9.97	9.18	440	181	140	63
275	2012	b	19.55	8.5	7.24	390	188	134	77
276	2012	a	20.75	12.14	9.87	203	92	48	35
276	2012	b	21.59	15.46	11.13	273	122	61	50
277	2012	a	10.71	5.53	5.32	124	100	33	31
277	2012	b	10.35	7.74	5.75	171	97	44	34
278	2012	a	19.97	10.83	8.97	256	198	56	60
278	2012	b	21.9	10.32	8.28	524	469	117	131
279	2012	a	16.3	11.29	7.26	172	74	36	32
279	2012	b	19.88	11.36	8.19	368	266	84	96
280	2012	a	16.35	10.72	8.59	381	357	95	106
280	2012	b	14.45	11.11	7.03	365	236	90	90
281	2012	a	13.45	11.89	7.57	973	235	234	122
281	2012	b	24.52	11.66	10.43	1420	870	370	339
282	2012	a	13.27	8	8.53	229	154	58	57
282	2012	b	15.25	10	9.64	285	213	76	77
283	2012	a	14.94	10.22	8.05	244	123	68	41
283	2012	b	17	11.59	7.4	208	104	57	36
284	2012	a	14.21	7.29	6.22	210	138	57	46
284	2012	b	16.69	7.84	7.61	353	147	90	56
285	2012	a	10.32	7.35	6.57	91	57	23	18
285	2012	b	11.33	7.27	6.27	80	83	20	27
286	2012	a	19.2	8.83	7.84	99	63	22	26
286	2012	b	15.68	8.16	5.89	94	91	25	32
287	2012	a	18.55	10.29	9.28	857	460	236	158
287	2012	b	13.98	13.27	9.83	519	359	132	106
288	2012	a	14.24	12.84	9.88	380	222	92	71
288	2012	b	15.25	12.37	10.41	238	117	49	41
289	2012	a	16.6	8.51	8.7	101	87	25	36
289	2012	b	15.11	8.65	8.36	63	58	15	22
290	2012	a	13.75	10.4	5.13	347	369	101	135
290	2012	b	21.01	12.85	8.03	281	223	70	99
291	2012	a	NA	NA	NA	NA	NA	NA	NA
291	2012	b	NA	NA	NA	NA	NA	NA	NA
292	2012	a	18.94	10.24	9.9	67	44	15	17
292	2012	b	17.36	10.15	9.55	159	143	36	44
293	2012	a	8.77	4.41	4.18	125	86	37	34
293	2012	b	11.43	5.9	6.48	170	111	52	39
294	2012	a	14.42	12.4	8.41	872	307	249	122
294	2012	b	8.86	7.95	5.1	559	191	164	77
295	2012	a	20.16	12.38	12.65	167	143	27	42
295	2012	b	19.84	14.14	11.89	398	339	73	94
296	2012	a	20.62	13.7	8.37	278	157	71	59
296	2012	b	19.96	10.12	8.18	316	192	85	74
297	2012	a	17.49	9.58	5.73	451	345	133	144
297	2012	b	12.65	6.16	5.79	461	369	135	165
298	2012	a	15.18	9.48	5.98	64	25	17	10
298	2012	b	12.82	6.14	5.43	49	19	13	7
299	2012	a	17.35	11.41	8.85	546	307	134	91
299	2012	b	18.46	13.11	8.56	600	416	161	123
300	2012	a	20.28	11.93	9.13	139	156	39	59
300	2012	b	15.27	6.83	6.19	139	87	34	41
301	2012	a	16.25	14.22	8.83	221	129	57	39
301	2012	b	18.15	10.42	8.33	283	217	75	60
302	2012	a	19.25	10.34	9.94	208	230	53	79
302	2012	b	14.21	7.11	6.35	82	66	23	23
303	2012	a	16.08	6.64	5.88	71	144	19	40
303	2012	b	12.65	6.39	6.5	60	72	16	25
304	2012	a	17.8	7.5	5.52	75	32	21	16
304	2012	b	20.39	10.01	8.47	150	106	37	43
305	2012	a	25.78	10.9	9.36	706	534	192	188
305	2012	b	19.21	8.91	7.76	539	442	135	153
306	2012	a	19.62	10.02	9.82	168	268	40	70
306	2012	b	17.28	10.37	9.54	131	179	32	56
307	2012	a	17.1	7.66	5.61	32	56	8	15
307	2012	b	18.08	10.93	9.52	134	129	37	45
308	2012	a	13.75	6.41	5.61	208	139	58	56
308	2012	b	11.34	6.38	4.55	171	127	55	55
309	2012	a	19.3	13.21	7.13	399	201	105	89
309	2012	b	15.01	9.88	6.34	766	365	202	160
310	2012	a	10.05	6.32	4.04	265	120	72	37
310	2012	b	13.25	7.37	6.01	805	130	80	43
311	2012	a	19	11.14	9.94	163	112	47	48
311	2012	b	9.95	6.9	7.52	239	137	62	59
312	2012	a	14.5	9.4	7.2	255	115	86	43
312	2012	b	9.71	8.31	5.98	545	184	183	69
313	2012	a	18.76	10.64	9.63	285	170	65	56
313	2012	b	12.5	9.49	7.76	141	88	31	29
314	2012	a	16.31	9.53	7.36	575	511	168	183
314	2012	b	17.57	14.56	8.52	146	171	43	58
315	2012	a	19.78	12.85	10	148	88	30	39
315	2012	b	20.58	12.32	11.75	120	68	24	28
316	2012	a	11.35	7.81	7.08	341	169	104	53
316	2012	b	10.61	9.69	6.26	260	125	74	39
317	2012	a	22.42	11.16	9.74	181	327	45	102
317	2012	b	17.94	8.68	7.92	303	468	65	138
318	2012	a	15.1	6.38	6.75	270	220	72	72
318	2012	b	13.8	9.2	7.2	222	187	61	66
319	2012	a	13.63	6.03	5.57	66	50	19	20
319	2012	b	11.09	5.57	5.44	76	62	24	22
320	2012	a	12.14	9.77	7.2	290	127	96	52
320	2012	b	9.95	3.55	5.84	186	116	62	43
321	2012	a	8.59	6	5.02	80	34	29	17
321	2012	b	12.89	6.22	5.37	40	13	20	11
322	2012	a	15.23	8.38	7.96	91	74	22	24
322	2012	b	13.64	9.33	8.63	99	95	22	29
323	2012	a	21.67	9.15	8.46	142	236	38	67
323	2012	b	14.27	8.43	7.47	127	208	34	59
324	2012	a	16.09	7.64	7.28	288	143	87	49
324	2012	b	16.65	9.16	6.62	199	157	59	60
325	2012	a	18.77	9.27	8.82	545	474	156	134
325	2012	b	13.87	7.13	6.7	252	218	76	71
326	2012	a	21.07	13.05	8.97	219	255	60	95
326	2012	b	14.58	5.57	5.6	204	280	62	106
327	2012	a	16.21	7.64	7.29	154	198	31	65
327	2012	b	18.68	7.95	8.23	268	457	59	130
328	2012	a	13.88	9.03	6.97	130	65	32	20
328	2012	b	14.92	9.54	6.67	191	80	45	28
329	2012	a	14.34	7.61	6.78	160	96	40	34
329	2012	b	14.78	7.74	7.42	139	92	38	33
330	2012	a	10.78	7.62	5.54	146	58	37	25
330	2012	b	10.97	8.29	5.92	117	43	30	18
331	2012	a	24.75	13.92	13.34	191	218	41	58
331	2012	b	19.05	14.05	12.31	236	233	47	58
332	2012	a	14.84	8.18	7.73	102	54	25	19
332	2012	b	10.09	8.04	8.2	299	289	78	87
333	2012	a	17.2	8.47	7.92	271	125	50	43
333	2012	b	16.45	8.73	8.32	173	119	35	38
334	2012	a	14.85	10.64	7.09	199	109	46	56
334	2012	b	15.2	6.92	5.96	66	75	16	24
335	2012	a	22.46	13.2	11.73	329	212	88	79
335	2012	b	24.51	11.07	11.09	177	140	50	53
336	2012	a	16.8	11.9	9.3	147	50	39	18
336	2012	b	15.18	8.28	8.29	385	171	106	36
337	2012	a	11.03	8.94	6.36	212	137	61	45
337	2012	b	13.03	8.3	7.53	221	132	61	40
338	2012	a	19.88	11.59	6.89	677	526	189	181
338	2012	b	11.86	9.58	5.55	514	408	129	148
339	2012	a	19.91	11.71	8.14	962	450	311	155
339	2012	b	20.32	12.92	6.22	844	330	283	130
340	2012	a	19	10.46	9.01	153	255	37	77
340	2012	b	12.38	8.01	7.64	58	97	15	27
341	2012	a	19.62	9.6	7.32	123	147	38	45
341	2012	b	15.84	8.24	7.36	149	131	46	41
342	2012	a	13	10.96	5.46	368	148	112	65
342	2012	b	15.83	10.3	6.86	272	272	82	178
343	2012	a	13.07	9.11	5.03	476	192	142	95
343	2012	b	19.57	9.25	8.39	812	304	220	149
344	2012	a	14.88	12.48	6.42	352	162	120	71
344	2012	b	16.78	12.28	7.8	269	126	88	53
345	2012	a	10.7	10.4	5.8	74	40	24	19
345	2012	b	12.02	6.46	6.18	95	47	28	22
346	2012	a	12.84	7.48	6.73	318	156	117	79
346	2012	b	17.68	8.7	8.46	174	87	63	44
347	2012	a	18.37	10.11	9.68	165	141	36	46
347	2012	b	13.81	10.47	8.07	283	258	61	80
348	2012	a	24.12	9.93	9.12	252	126	63	55
348	2012	b	21.12	9.82	8.69	320	284	77	94
349	2012	a	18.51	11.73	7.12	257	182	69	78
349	2012	b	20.36	9.96	7.75	160	128	44	51
350	2012	a	12.97	7.59	7.22	47	50	10	18
350	2012	b	9.97	7.53	6.16	248	198	58	73
351	2012	a	13.26	7.55	6.86	83	35	23	20
351	2012	b	12.48	6.63	5.78	173	74	51	46
352	2012	a	NA	NA	NA	NA	NA	NA	NA
352	2012	b	NA	NA	NA	NA	NA	NA	NA
353	2012	a	13.88	8.01	7.11	143	117	36	43
353	2012	b	15.09	8.86	7.78	71	51	11	16
354	2012	a	13.81	8.61	8.4	79	141	19	35
354	2012	b	12.69	7.65	7.3	46	93	10	24
355	2012	a	11.86	6.49	6.02	70	54	20	23
355	2012	b	9	6.04	5.58	21	24	6	10
356	2012	a	14.54	11.54	7.98	275	188	78	67
356	2012	b	14.94	12.38	8.91	355	117	110	52
357	2012	a	13.45	12.47	10.25	388	231	95	68
357	2012	b	10.27	9.71	7.83	96	48	23	19
358	2012	a	17.07	8.37	8.45	331	416	88	113
358	2012	b	22.03	8.88	9.56	254	332	62	97
359	2012	a	13.14	8.06	7.17	39	19	9	12
359	2012	b	10.28	8.05	6.32	46	16	11	7
360	2012	a	17.53	17.39	7.58	40	11	13	10
360	2012	b	16.57	8.99	7.44	94	35	28	20
361	2012	a	NA	NA	NA	NA	NA	NA	NA
361	2012	b	NA	NA	NA	NA	NA	NA	NA
362	2012	a	12.54	6.07	5.15	327	406	27	49
362	2012	b	14.84	8.17	7.99	107	189	76	111
363	2012	a	7.16	4.68	4.48	264	161	88	58
363	2012	b	10.34	9.28	5.69	133	92	37	35
364	2012	a	11.27	8.02	7.85	226	128	58	42
364	2012	b	13.9	11.26	7.74	325	194	90	63
365	2012	a	10.95	7.3	7.74	33	16	7	8
365	2012	b	19.5	8.38	8.26	76	36	13	16
366	2012	a	5.89	4.16	4.15	187	183	50	61
366	2012	b	17.82	8.26	8.13	410	527	93	148
367	2012	a	15.12	12.29	8.62	117	13	24	10
367	2012	b	9.29	6.32	5.48	83	14	18	10
368	2012	a	19.47	8.76	6.73	398	345	100	101
368	2012	b	18.23	10.16	8.1	427	433	89	123
369	2012	a	17.44	14.88	7.87	826	191	225	93
369	2012	b	12.42	9.07	6.44	836	236	211	118
370	2012	a	23.16	17.51	13.42	484	192	101	84
370	2012	b	22.74	11.59	10.94	298	119	76	52
371	2012	a	23.35	10.33	9.93	126	82	32	49
371	2012	b	NA	NA	NA	NA	NA	NA	NA
372	2012	a	12.5	7.54	6.1	404	293	98	92
372	2012	b	11.17	6.48	6.32	343	252	88	88
373	2012	a	19.8	8.24	8	109	138	28	16
373	2012	b	21.1	9.72	8.88	157	160	37	55
374	2012	a	16.2	11.15	10.35	282	191	62	55
374	2012	b	12.74	9.99	9.51	39	43	9	15
375	2012	a	17.41	12.64	8.4	212	180	56	62
375	2012	b	20.65	13.99	9.05	339	252	186	89
376	2012	a	11.11	9.66	6.7	108	37	29	17
376	2012	b	NA	NA	NA	NA	NA	NA	NA
377	2012	a	14.08	8.89	6.46	107	26	26	15
377	2012	b	13.67	12.82	8.36	341	127	79	49
378	2012	a	17.7	12.12	3.75	383	170	103	108
378	2012	b	NA	NA	NA	NA	NA	NA	NA
379	2012	a	6.98	4.64	3.99	240	136	59	48
379	2012	b	11.47	8.17	5.82	987	491	233	165
380	2012	a	15.14	6.82	6.47	239	208	73	71
380	2012	b	13.32	6.58	6.06	244	212	71	71
381	2012	a	10.16	8.22	7.29	94	69	23	17
381	2012	b	12.25	9.06	7.11	147	107	40	30
382	2012	a	20.24	8.6	8.1	153	150	42	56
382	2012	b	12.54	6.22	5.65	95	127	27	49
383	2012	a	21.04	11.02	8.98	91	141	21	41
383	2012	b	16.62	9.24	8.45	234	259	54	80
384	2012	a	14.06	11.49	8.2	164	209	34	59
384	2012	b	19.76	11.95	12.53	238	241	46	85
385	2012	a	20.47	10.55	8.59	119	83	32	29
385	2012	b	19.81	12.9	9.52	155	113	42	40
386	2012	a	15.72	9.91	8.67	792	535	187	141
386	2012	b	15.47	9.81	8.84	388	243	88	65
387	2012	a	12	10.27	7.12	257	123	61	51
387	2012	b	19.24	7.57	8.51	184	116	50	44
388	2012	a	16.09	8.44	8.57	302	318	75	106
388	2012	b	11.33	6.16	5.7	263	346	65	103
389	2012	a	19.29	9.31	8.35	211	276	51	81
389	2012	b	11.96	6.74	5.75	152	189	43	59
390	2012	a	17.39	12.32	8.43	337	175	102	66
390	2012	b	18.76	13.63	9.73	692	306	202	112
391	2012	a	16.2	8.5	7.6	435	188	119	88
391	2012	b	16.26	8.93	7.77	489	166	131	88
392	2012	a	17.5	13.5	6.7	732	382	476	202
392	2012	b	NA	NA	NA	NA	NA	NA	NA
393	2012	a	28.57	9.64	8.96	312	190	63	70
393	2012	b	24.74	13.66	11.82	131	128	28	44
394	2012	a	12.38	10.63	6.15	390	71	101	39
394	2012	b	9.46	7.23	5.26	250	108	71	41
395	2012	a	22.05	9.88	9.66	85	116	22	38
395	2012	b	21.75	9.81	9.05	165	226	41	71
396	2012	a	11.54	9.83	6.11	378	155	119	65
396	2012	b	9.61	13.38	8.29	127	42	35	22
397	2012	a	9.35	5.6	5.21	214	163	78	66
397	2012	b	11.01	6.02	5.67	111	111	44	49
398	2012	a	25.18	15.24	10.59	1260	549	359	234
398	2012	b	22.5	18	10.35	791	307	200	132
399	2012	a	19.96	12.46	9.53	174	172	44	59
399	2012	b	18.25	9.63	9.42	140	110	37	44
400	2012	a	NA	NA	NA	NA	NA	NA	NA
400	2012	b	NA	NA	NA	NA	NA	NA	NA
401	2012	a	15	10.2	8.3	513	249	162	121
401	2012	b	13.8	8.02	7.18	399	254	128	113
402	2012	a	NA	NA	NA	NA	NA	NA	NA
402	2012	b	NA	NA	NA	NA	NA	NA	NA
403	2012	a	23.59	12.07	7.57	467	254	120	96
403	2012	b	18.57	9.47	6.87	432	286	104	113
404	2012	a	14.84	8.04	8.43	403	225	97	87
404	2012	b	15.49	6.7	6.3	375	217	86	97
405	2012	a	23.7	12.49	9.59	216	153	51	54
405	2012	b	22.32	12.29	9.36	243	232	49	87
406	2012	a	16.8	7.45	7.13	190	231	51	93
406	2012	b	24.11	14.03	11.33	130	147	23	45

## Sheet: Sorghum Diversity Panel
Taxa	BD_2009	BD_2010	MD_2009	MD_2010	RD_2009	RD_2010	DLW_2009	DLW_2010	WLW_2009	WLW_2010	DSW_2009	DSW_2010	WSW_2009	WSW_2010
PI152595	NA	NA	NA	NA	NA	NA	NA	NA	NA	NA	NA	NA	NA	NA
PI152651	10.5	16.55	7.1	12.7	6.25	7.7	28.85	68	71.9	158.5	28.15	133	110	505
PI276837	22.85	22.95	15.05	17.45	9.2	9.75	73.65	104	126.6	168.5	281.3	358	469.2	1132.5
PI34911	21.7	24.5	14.4	18.05	8.5	11.35	64.1	93	100.25	244.5	106.2	171	268.2	591.5
PI48770	14.25	20.7	10.8	14.7	7.55	9.7	36.6	30	89.9	59	32.65	51.5	105.05	221.5
PI533750	9.95	16.05	5.65	9.85	5.35	10.55	11.3	17	23.35	40.5	6.35	20.5	17.2	97
PI533752	18.2	22.2	11.35	10.7	8.5	7.65	38.7	79.5	84.8	168	40.65	56.5	114.05	283
PI533754	17.15	17.45	11.15	9.25	9	8.75	21.9	21.5	58.1	29	24.85	20.5	101.8	123.5
PI533755	10.75	12.5	3.9	6.9	3.05	4.45	7.55	38	15.15	82.5	5.35	15.5	18.35	68.5
PI533757	15.85	20.75	9.9	8.9	8.35	8.25	42.1	38	126.1	112.5	24.4	28.5	99.8	147.5
PI533758	11	21.7	7.8	12.45	5.6	9.55	18.15	25.5	47.8	44.5	13.85	18	56.25	114
PI533759	16.75	16.45	9.15	8.75	8.3	8.65	38.35	19.5	129.3	39	13.95	12	70.7	56.5
PI533760	11.1	14.45	7.3	12.9	5.6	9.5	18.2	80.5	62.1	188	12.75	89	56.2	392.5
PI533761	22.6	23.8	11	18.1	9.95	10.9	72.2	119	183.75	300.5	57.25	218.5	170.65	830
PI533762	11.5	18.1	5.7	12.5	6.35	10.2	12.1	18	19	29.5	7.6	15	20.8	72
PI533766	9.35	18.8	5.65	6.4	5.15	8.1	23.3	41	46.05	43	14.6	42	50.2	173
PI533769	14.95	16	10.2	9.3	8.7	8.3	26.8	39	63.65	69.5	17.1	19	83.9	81.5
PI533776	11.8	14.95	7.7	11.65	7.2	10.35	12.55	62	17.3	113	6.9	58.5	17.45	198
PI533785	11.9	17.65	6.45	6.45	5.8	7.1	12.9	33	21.7	49.5	6.35	16.5	30.4	69.5
PI533788	9.05	12	4.9	6.55	4.4	6	9.1	6	22	8	7	10.5	20.8	25
PI533789	17	26.75	7.25	11.2	5.55	6.35	31.65	98.5	71.35	286.5	12.6	118	50.7	418
PI533792	12.65	23	10.9	10	7.65	9.8	29.9	51	94.25	72	17.75	39	70.55	157
PI533794	13.8	45.45	8.9	12	7.5	10	33.55	120	109.7	345	17.4	143	78.35	623
PI533799	15.3	24.05	10.35	13	5.85	11.6	44.95	60.5	139.85	138	36.2	61	144	286
PI533800	19.55	22.8	9.1	15.7	8.3	9.05	42.1	82	79.95	185.5	30.5	95.5	132.2	425.5
PI533807	19.95	24.6	12.45	17.45	8.25	10.4	28.75	94	70.8	249.5	22.8	166.5	89.45	766
PI533810	15.85	18.3	13.55	11.5	8.2	10.2	31.8	36.5	65.75	81	23.7	25.5	74.8	115
PI533814	16.5	NA	11.75	NA	9.65	NA	25.6	NA	73.05	NA	16.7	NA	70.75	NA
PI533821	16.3	18.5	13.5	13.8	9.2	8.4	27.7	33	35.25	71	19	47	60.9	257.5
PI533822	19.05	16.8	10.8	8.85	8.7	8.35	29.95	18.5	77.85	39.5	21.25	23.5	67.3	85
PI533824	15.05	23.45	11.8	13.15	8.4	10.65	20.3	30.5	43.35	74.5	14.05	31.5	59.3	153
PI533831	19.6	23.1	12.65	12.9	11.65	9.65	22.25	98	41.2	219	13.15	115.5	56.65	465.5
PI533833	10.3	21.05	6.7	14.4	5.7	8.6	20.6	56.5	77.35	125.5	7.9	40	37	191
PI533838	14.9	14.3	10.5	8.05	5.05	7.4	21.55	50.5	54.95	141	32.2	66.5	144.9	305.5
PI533839	10.1	14.95	9.5	8.25	5.75	5.2	NA	NA	NA	NA	NA	NA	NA	NA
PI533841	10.7	16.75	5.5	7.95	4.45	6.35	16.1	22	43.3	50.5	6.8	14.5	29.9	64
PI533842	9.35	13.75	6.8	8	6.5	8.6	5.8	34	8.6	42.5	3.9	24	16.65	75.5
PI533843	11.25	18.25	8.05	13.95	6.25	10.1	11.7	26.5	23.55	54.5	9	31.5	32.4	123
PI533845	13.2	14.5	8.55	9.4	7.3	7.55	10.6	15	15	32.5	8.1	11.5	30.35	45.5
PI533852	13.4	16.45	8.6	13	8.9	11.05	20.95	17.5	61.75	20	8.4	13	55.45	57.5
PI533855	12.15	17.5	8.25	9.1	6.55	6.9	26.85	33.5	103.05	77.5	20	49	91.3	231
PI533856	13.3	20.55	9.55	15.5	10.05	11.2	35.6	27.5	113.05	46	18.1	27	76	130.5
PI533863	14.65	NA	5.8	NA	4.55	NA	NA	NA	53.15	NA	NA	NA	131.7	NA
PI533866	15.6	19.65	8.45	9.6	7.65	8.45	14.95	10	35.9	17	13.25	9	58.15	38
PI533869	14.65	17.85	11.55	12.25	7.75	8.4	56.75	71	132.05	174	41.55	99.5	132	353
PI533871	14.75	19.75	8.35	17.6	5.45	7.4	30.2	24.5	84.05	76.5	31.95	29.5	116.6	118
PI533876	12.3	19.7	7.1	11	5.75	9.3	22.4	42.5	68.85	108.5	17.35	46.5	66.55	206
PI533877	7.65	18.35	4.5	12.9	4.1	9.6	12.25	28	30	58.5	5.2	18.5	17.8	101.5
PI533878	14.85	NA	10.6	NA	8.8	NA	25.15	NA	58.7	NA	16.45	NA	68.85	NA
PI533882	23.45	23.8	NA	9.9	NA	6.7	61.8	53	152.4	59	69.85	58	232.2	320
PI533901	12.7	17.75	7.1	11.4	6.7	8.55	21.9	44.5	57.75	104	12.55	39.5	57.2	165
PI533902	18.6	22.3	12	10.75	10.2	11.2	67.15	36.5	225.6	74	43.8	25.5	178.25	303.5
PI533910	14.35	25.3	10.05	11.4	6.55	9.1	16.55	49	43.35	118	12.05	57.5	35.5	211.5
PI533911	18.35	27.05	9.8	17.2	7.7	10.05	44	43	117.95	98.5	48.8	44.5	175.9	245
PI533912	8.75	16.7	5.85	11.55	5.15	8.65	10.85	28.5	17.65	73.5	12.9	77	42.35	355.5
PI533913	9.35	18.15	7.05	10.75	5	7.1	26.45	14	65.8	18.5	21.8	9.5	81.9	47.5
PI533919	18.1	21.75	13.75	14.3	10.75	12.5	26.9	45.5	84.3	55.5	33.95	22	150.45	88.5
PI533924	20.7	20	13.85	8.9	10.45	8.9	43.25	23.5	103.5	45.5	28.35	16.5	85.8	79.5
PI533927	17.55	11.2	13.1	10.35	9.2	7.45	41.95	21.5	114.8	46.5	40.1	20	126.95	70.5
PI533936	10.2	17.15	5.15	7	3.4	4.9	16.8	37.5	56.45	102	5.9	33.5	22.55	120.5
PI533937	13.55	20.5	6.15	10.8	5.7	9.1	21.55	30.5	54.1	79.5	66.4	31	80.4	147
PI533938	15.8	21.25	14	15.05	7.9	9.45	34.75	24.5	98.4	59	35.1	32.5	138.1	183.5
PI533939	15.75	17.6	11.9	12.45	8.75	8.75	20.05	13	29.7	20	30.15	18.5	101.5	91.5
PI533940	9.65	16.6	7.7	9.4	5.8	7.9	14.45	17.5	28.05	37	17.45	28.5	53.35	142.5
PI533943	14.65	21.05	9.1	12	8	11.8	14.45	23.5	25.1	44	13.05	22	56.1	122.5
PI533948	7.7	14.85	4.2	7.75	4.35	7.4	8.75	33	17.45	45	5.3	30.5	24.2	126.5
PI533955	8.75	17.7	5	8.9	4.65	7.8	11.35	33.5	24.3	71.5	5.3	24	18.4	115.5
PI533956	14.65	17.05	10.8	11.15	8.1	5.95	22.25	20	53.35	34.5	28.25	33	111	141
PI533957	8.75	23.75	5.75	10.35	4.75	8.4	10.8	48.5	26.5	93	5.9	33.5	38.85	162.5
PI533961	16.05	15.15	12.3	10.8	9.3	7.45	39.15	16	154.7	26.5	21.6	10	89.9	41
PI533962	13.7	22.05	9.15	14	5.3	6.6	48.25	38.5	150.3	107	35.7	55	145.6	203.5
PI533964	21.45	28.35	10.85	17.45	8.75	10.7	46.25	51.5	113.3	102.5	38.5	36.5	129.1	170.5
PI533965	15	17.75	9.8	10.3	6.7	6.75	33.85	45.5	83.55	149	26.3	42.5	60.25	191
PI533967	15.9	20.65	10.95	10.95	7.15	7.65	28.6	60.5	62.6	153.5	11.7	54	42.55	222.5
PI533970	16.7	21.95	9.95	15.55	7.35	9.45	41.95	63.5	83	157.5	44.75	91.5	152.6	358.5
PI533972	14.05	20.25	10.7	11.2	8.7	5.5	38.6	55.5	78.45	165	29.1	44	83.15	191
PI533976	15.6	20.55	11.65	12	9.35	8.05	44	41	88.05	102	33.45	32.5	94	132
PI533979	10.45	17.1	6.8	10.75	6.15	8.15	21.35	14	58.8	24	23.25	13.5	90.5	60
PI533980	14.35	18.65	9.4	12.5	7.45	10.5	39.9	93.5	99.2	234.5	20.05	93.5	60.75	364
PI533985	16.8	21.3	11.8	11.75	9.15	8.05	52.6	71	201	168.5	25.3	74	107.65	278.5
PI533986	17	23.3	8.65	12.1	7.4	8.9	49.55	65.5	158.65	158	32.15	54	136.25	223
PI533987	14.65	18.65	10.25	13.15	6.8	10.1	10.3	34	51.65	79	18.85	62	58.35	258.5
PI533989	15.05	21.95	7.7	10.65	7.8	9	30.75	104.5	66.4	314.5	22.5	96	83.55	383
PI533991	14.2	26.95	9	12.8	10.95	10.15	26.15	96	71.2	276.5	16.25	107.5	56.55	477.5
PI533996	13	19.45	7.55	10.95	7.65	12.05	27.7	23	61.3	35.5	21.55	20.5	64.05	84
PI533997	10.2	18.4	8.45	13.4	6.45	9.55	11.35	16.5	25.45	28.5	12.2	20.5	46.4	88
PI533998	12.15	13.3	7.05	11.05	4.1	5.2	30.9	27.5	54.3	55.5	21.7	29.5	71.9	95.5
PI534009	14.15	48.7	11.05	9.8	8	7.3	26.75	26.5	33.7	52.5	37.4	33	109	120
PI534021	14.1	23.4	9.6	10.75	9.05	10.35	17.65	39.5	21.65	59.5	16.75	28	50.7	137.5
PI534028	16.3	23.6	15.7	20.6	10.8	15.4	36.05	41	130.45	69	34.85	42.5	123	213.5
PI534037	10.25	14.75	6.1	8.85	5.6	7.55	20.15	25.5	46.05	43	15.45	21.5	74.2	97.5
PI534053	14.7	20.2	12	8.15	9.8	8.1	24.85	63.5	58.7	150	20.75	53	59.9	208
PI534054	12.3	20.65	8.3	10.4	5.9	7.4	17.15	29	39.2	65.5	9.9	18	34.65	76
PI534063	10.1	19.15	7.55	10.1	6.05	7.95	20.5	33	44.5	67.5	24.75	57	65.85	188
PI534070	10.75	16.8	6.7	7.05	4.95	6.7	16.35	19.5	37.3	31.5	18.3	19	75.9	40
PI534075	14.5	12.9	11.45	9.55	9.25	9.5	15.55	49.5	27.75	67	14.5	44.5	49.75	172.5
PI534079	14	22	9.35	14.3	7.4	10.2	19.15	20.5	48.05	37	21	26	82.4	148.5
PI534088	10.65	16.75	7.35	9.3	7.15	10.15	11.45	41	21.45	76.5	13.25	54.5	47.15	177.5
PI534092	15.7	16.05	10.6	10.9	8.4	9.25	31.5	43.5	71.85	75.5	18.4	59.5	67.15	231.5
PI534096	10.6	12.15	5.7	8.35	4.7	6.15	9.85	23	19.8	32.5	9.05	31.5	27.9	73
PI534097	12.5	17.25	5.45	7.8	4.05	5.9	17.9	19.5	56.55	46.5	14	17	61.5	73
PI534099	17.35	19.25	12.5	11.1	7.4	8.75	45.4	59.5	129.45	155	32.75	49.5	116.75	177
PI534101	13.1	20.7	7.35	10.1	6.5	8.3	19.6	58.5	36.5	132.5	11.45	61	38	261
PI534104	12.1	18.55	8.7	13.2	7.7	7.9	67.1	65	200.55	211	58.55	84	199.65	345
PI534105	14.8	19.15	8.9	9.85	7.6	8.3	28.75	40.5	92.7	99.5	14.75	44.5	68.5	173
PI534108	15.4	25.45	11.45	13.5	8.1	9.2	27.55	46.5	92.1	92.5	21.55	75	83.35	305
PI534112	15.25	17.7	8.5	12.65	7.45	8.8	42.6	103	139.75	256	24.75	139.5	98.7	577.5
PI534114	16.45	19.35	8	9.55	7.25	7.2	37	58	100.5	128.5	24.05	52	77.65	153
PI534115	17.95	NA	9.95	NA	11.15	NA	23.3	NA	40.85	NA	21.5	NA	71.6	NA
PI534116	17.55	20.3	7.4	7.15	6.6	6.65	30.25	54.5	84.9	91.5	34.35	61.5	139.65	203
PI534117	10.8	15.15	8.85	8.95	8.15	8	25.3	8	78.7	10	23.2	7.5	98.55	38
PI534123	20.6	21.05	12.6	8.3	8.7	8.1	29.55	26.5	67.65	46.5	44.45	23.5	189	120
PI534124	17.35	19.1	8.4	7.6	6.7	7.1	41.75	20.5	113.15	52	40.45	27.5	129.45	93.5
PI534127	9.95	20.2	7.45	8.85	7.2	8.1	18.15	25.5	24.35	45	34.35	57	94.85	236.5
PI534128	18.35	24.3	13.85	11.2	8.65	10	44.2	58	91	170	57.2	60	140.7	240
PI534132	14.15	26.65	7.85	11.25	8.65	11.5	20.45	98.5	43.3	177	12.6	360	55.3	1466
PI534133	19.15	20.65	10.85	11.9	10.05	9.9	45	44.5	106	98	38.35	47.5	114.95	210
PI534135	15.4	21.75	12.5	9.75	9.95	10.15	37.95	40	78.5	81	21.95	23.5	52.35	92.5
PI534137	13.9	17.2	6	8.5	5.3	5.9	19.45	44	35.5	65.5	16.85	46.5	60.1	165.5
PI534138	9.7	17.4	6.95	6.2	5.05	6.2	10.2	74	36.7	159	9.05	45.5	27.9	145.5
PI534139	14.25	16.3	10.1	10.8	8.7	6.3	11.35	19	32.8	37	19.95	29	106.85	131.5
PI534144	15.7	22.45	14.2	15.5	10.95	8.6	41.4	50.5	114.55	113	70.4	104	246.25	341.5
PI534145	11.65	19.55	9.9	11.4	6.15	8.5	18.5	57	38.55	147	28.3	89	107.2	372.5
PI534148	16.4	21.8	13.9	11.15	10.25	10.1	32.25	28	74.1	51.5	25.1	38	103.15	169.5
PI534155	21.15	23.9	10.6	10.6	11.25	9.8	61.65	30.5	179.55	75	22.75	32	128.9	159
PI534157	17.1	25.3	8.2	11.4	7.35	9.05	40.95	61	123.05	152	19.4	50	75.85	197.5
PI534163	19.25	24.05	8.45	9.9	7.25	6.45	36.475	58.5	93.825	131.5	28.8	71.5	92.525	273.25
PI534167	11.4	16.25	5.85	9.75	5.15	6	27.8	25.5	58.95	81	17.25	20	48.9	92.5
PI540816	17.75	25	11.45	15.3	9.45	11.6	32.6	53	88.3	149	19.4	32	67.65	128
PI542718	9.35	16.5	8.45	14.55	7.65	11.05	13.3	14.5	30.55	16	21.25	17.5	66.1	30.5
PI548797	16.2	24.2	11.9	16.7	8.6	10.75	78.4	91.5	119.4	203.5	110.9	83.5	284.1	289.5
PI552856	12.65	19.8	7.5	13.2	7.65	10.4	21.1	40	43.65	90	18.75	44	76.35	168
PI552861	13.45	21.9	10.7	13.85	9.45	11.75	20	48.5	41.7	117.5	17	62	70.5	211
PI561071	13.85	20.25	10.05	9.7	9.5	6.9	36.7	32.5	72.75	73.5	30.5	43.5	52.55	161.5
PI561073	15.6	19.5	14.35	16.25	8.7	9.7	28.55	60.5	42.5	157.5	43.3	65.5	121.9	267.5
PI561472	14.25	19.85	11.8	13.95	8	7.35	56.55	76.5	104.35	137	138.4	161	312.75	570
PI564164	11.9	18.85	7.25	9.7	7.15	6.7	24.9	30	62.55	79.5	15.5	20	53.1	83
PI564165	14.6	18.25	6.25	11.05	5.5	9.6	39.4	40.5	124.55	103.5	19.95	25.5	72.7	106
PI576130	15.5	21.8	13.15	14.2	9.35	10.3	24.45	23.5	34.35	34	69.35	93.5	164.5	318
PI576332	11.65	14.2	6.2	10.95	5.2	6.4	17.75	25.5	39.05	100.5	18.65	40.5	76.9	166
PI576333	12	17.7	7.05	12.85	6	8.7	17.25	21	32.15	44.5	13.5	16.5	52.25	80
PI576339	13.45	22.65	8.25	12.45	6.5	9.05	21.85	24	50.15	32.5	16	23	78.25	106
PI576340	15.95	21.65	9.6	12.05	6.5	6.8	29.55	31.5	35.2	46.5	57	46	143.95	160.5
PI576345	12.65	26.5	11.25	20.4	8.65	13.1	28.75	70	83.15	132	25.1	106	98.1	456
PI576347	11.2	21	9.45	10.8	5.9	8	19.15	36	40.95	48	29.95	111	126.1	352
PI576348	10.35	11.95	7.4	5.7	5.2	2.5	26.8	NA	53.45	56	49.05	NA	165.65	215
PI576349	7.8	12.2	5.5	6.15	4.95	4.65	11.15	18.5	13.5	26	11.65	23	37.15	105
PI576350	9.95	20.8	6.45	13.35	4.15	9.8	9.45	47	12.65	123.5	14.25	56.5	39.55	226
PI576352	12.4	17.2	10.15	9.15	8.6	8.75	14.35	17	21.85	23.5	12.35	8	29.15	37
PI576359	13.65	19	10.8	15.35	7.7	8.95	22.35	77.5	50.85	143.5	28.1	130	111.7	427
PI576364	10.35	14.8	7	7.4	5.25	6.15	13.6	15	31.25	15.5	10.6	6.5	47.8	25
PI576366	11.25	13.8	7.1	8.45	6.7	8.1	13.05	9.5	41.3	11	11.8	8	48.15	22.5
PI576373	13.1	20.85	5.85	9.65	5.15	8.65	18.05	21.5	43.05	43	7.25	23	24.65	94.5
PI576375	15.35	27.8	8	14.8	7.05	14.2	22	82	66.65	117	10.15	122	32.4	396
PI576376	11.5	23.95	6.05	13.1	5.95	13.55	18.65	29.5	59.05	49.5	10.95	26.5	41.85	97.5
PI576380	15.8	23.4	10.25	20.1	6	11.95	43.95	52.5	102.35	93	49.45	70	213.9	379
PI576381	15.3	22	8.45	12.5	8.8	11.05	16.15	34	29.55	103	8.8	25	27.4	126
PI576385	12.4	19.9	7.35	9.4	8.3	9.2	10.05	31.5	12.9	53	12.3	34.5	62.5	147.5
PI576386	16.15	23.95	10.55	15.65	6.9	8.45	41.55	58.5	76.35	150	75.2	74	188.8	339
PI576387	10.8	19.65	7.75	12.85	5.85	8.6	14.55	38	34.4	100.5	15.25	32.5	39.8	131.5
PI576390	8.85	13.3	6	10.7	4.85	8.95	8.7	11	14.1	24.5	9.05	11.5	28.9	63
PI576391	11.55	17.4	9.5	12.2	6.85	7.35	19.4	15	42.85	16.5	17.2	33	56.35	114.5
PI576393	12.95	19.15	8.1	11.05	6.45	9.15	18	26	37.7	41.5	10.9	18.5	49.5	71
PI576394	14.15	19.6	10.85	12.3	7.6	10.35	20.05	16.5	64	33	17.55	24	90.9	131.5
PI576399	15.1	21.05	9.7	14.9	6.65	7.15	21.75	20.5	53.5	32.5	29.15	32	114.1	133
PI576401	16.35	24	11.4	17.9	10.1	13.1	29.55	27	48.9	51	25.25	56	89.2	270
PI576418	17.55	24.95	9.4	16.15	6.9	8.95	27.1	56.5	43.4	131	25	89	75.2	297.5
PI576422	13.6	21.1	7.4	13.65	5.95	9.6	24.85	60.5	71.4	194.5	16.55	65	60.95	293
PI576425	14.5	23	7.9	12.95	9.1	10	23.65	29.5	62.55	46.5	14.85	24	54.95	126.5
PI576426	13.05	28.15	7.2	14.35	7.6	11.6	15.9	81	27.4	145.5	10.4	90	33.4	363.5
PI576428	12.8	26.65	9.45	12.9	6.75	7.4	26.5	49.5	60.85	92	13.75	50.5	55.4	236.5
PI576435	14	17	11.3	16.9	8	11.2	21.25	14	38.45	19	17.9	23.5	74.75	117
PI576437	11.5	16.45	7.8	10.4	5.4	5.95	14.35	21.5	24.55	35	23.8	49.5	82.9	171
PI585291	15.2	19.1	9.1	11.95	7.85	7.85	23.2	23.5	59.6	60	17.35	26	72	107.5
PI585295	14.75	24.4	7.8	13.75	6.6	8.1	26.35	86	50.8	196.5	16.9	72	41.2	311.5
PI595699	9.1	13.5	6.05	8.45	3.9	9.3	6.9	24	9.5	27.5	6.4	14.5	21.6	58
PI595702	14	21.4	9.45	8.6	6.9	6.2	14.1	17.5	33.35	38	23.3	18.5	106.2	97
PI595714	16	20.35	9.95	13.45	9.2	10	27	61.5	64.15	172.5	15.7	46.5	63	224
PI595718	7.85	16.7	5.95	10.05	5.05	9.2	16.2	20.5	29.25	28.5	15.75	14.5	39.6	60.5
PI595720	9.25	10.7	6.3	9.95	5.9	10.3	7.25	12.5	16.6	14	5.4	10.5	18.8	38
PI595739	20.65	26.05	10.9	12.55	9.15	11.5	43.15	77.5	128.05	166.5	22.75	100	87.9	510.5
PI595740	12.4	17.65	8.9	11.1	7.15	6.3	26.5	46	71.3	126	18.7	46.5	67.5	188
PI595741	9.25	9.8	5	6.9	4.5	4.4	8.85	13	16.35	14.5	5.7	8.5	16.3	24.5
PI595743	20.4	19.65	8	6	6.9	6.3	61.8	36.5	200.15	83	19.55	24.5	99.85	100
PI595744	12.1	18.8	8.8	16.55	8.55	10.4	20.4	68.5	53.5	183.5	16.5	91.5	80.15	423
PI595745	20.6	25.7	10.8	13.85	8.5	9.7	28.05	51.5	51.3	114	24.25	49	92.1	255
PI597945	14.45	20	10.45	13.95	7.6	10.9	22.3	18	36.75	26	21.2	21	59.05	89
PI597946	10.85	13.35	6.1	9.75	5.1	7.55	5.9	22.5	6.65	40.5	8.5	21	25	125
PI597949	11.4	15.65	9.95	8.9	8.5	6.75	27.2	31.5	40.75	46.5	26.7	31	79.55	135
PI597950	10.3	10.6	10.55	10.2	6.9	7.9	9.75	9	15.45	11	17.05	27	53.4	101.5
PI597951	13.95	11.25	8.55	8.9	5.75	4.9	20.35	37.5	52.45	90	12.15	42.5	48.25	196.5
PI597952	17.5	18.3	8.5	7.75	8.05	6.6	25.65	13.5	61.75	22	14.2	8	54.3	37
PI597957	13.25	17.35	7.5	10.4	6.7	11.4	18.7	32	51.1	92	14.95	33	44.4	150
PI597960	16.2	NA	5.55	NA	6.25	NA	32.85	NA	85.6	NA	17.65	NA	68.9	NA
PI597961	19.6	18.95	16.2	13.4	11.9	9.6	56.4	102	148.35	250	44.7	104	180.1	440
PI597964	18.45	26.2	12.25	14.2	7.8	9.1	43.85	72.5	125.35	205.5	27.35	112.5	96.8	450.5
PI597965	10.45	18.35	8.4	12.75	7.6	7.9	16.65	23	27.2	33.5	15.05	22.5	49.95	94
PI597966	11.4	16.1	6.4	11.35	6.35	9.45	17.25	35.5	42.3	53	11	23	46.95	107
PI597967	20.35	27.6	18.65	23	6.05	17.2	35	45	70.15	50	29.6	30	132.7	122
PI597968	13.55	17.85	7	9.3	5.7	7.15	22.1	16	47.75	19.5	9.55	10	29.55	39
PI597971	11.6	21.4	7.15	8.6	6.55	7	18.5	24.5	32.75	55	7.95	18.5	41.8	113
PI597972	10.45	14.4	6.05	10.15	5.5	10.5	14.95	41.5	39.4	70.5	11.5	50.5	41.9	182.5
PI597973	15.25	23.6	7.75	10	8.25	9.2	27.75	35.5	35.55	59	9.4	18.5	39.2	99
PI597976	13.65	16.25	8.65	10.6	6.2	6.6	16.8	14.5	38.55	27.5	21.85	32	70	123.5
PI597980	14.4	20.35	10.45	11.15	8.7	9.5	32.45	38.5	70.45	83	26.4	33.5	93.65	145.5
PI597982	10.6	17.05	7.75	12.5	6.6	9.2	7.85	15.5	9.85	21	11.2	15	31.25	77
PI598069	12.35	13.55	8.25	9.35	4.9	4.3	19.75	9.5	29.65	16	34.3	52	118.4	188
PI598070	12.05	16.7	6.9	12.85	5.15	4.65	13.2	70.5	17.35	112.5	24.15	270	81	1084.5
PI601816	14.65	24	12.3	16.15	6.85	10.4	30.3	239	45.1	534	44.25	547.5	142.05	2174.5
PI607931	14.25	24.4	7.3	11.35	6.4	7.6	27.05	32.5	63.45	60	13.5	25	55.1	129
PI609456	20.3	17.75	12.35	13.55	6.1	5.65	51.6	38.5	100.5	49	199.55	145.5	419.8	436.5
PI613536	47.7	13.1	5.9	9.75	5.95	8.05	15.4	58	36.1	140.5	7.85	83	29.7	356
PI629034	13.2	17.95	8.4	8.35	7.2	6.85	25.25	27.5	79	72.5	14.7	21.5	56.7	90.5
PI629040	13.65	15.9	7.85	9.5	6.95	7.5	23.05	23.5	58.2	44.5	13	19.5	49.35	86.5
PI629059	14.5	18.65	7.6	11.5	6.65	8.15	27.2	28	55.05	68.5	15.75	22.5	54.3	103
PI641849	8.6	10	4.8	8.55	3.4	4.4	6.55	21.5	16.85	35	19	66	68.75	279.5
PI641874	12.8	13.45	9.3	10.35	7.15	8.05	12.9	10	18.35	22	10.9	8.5	51.7	56
PI642992	20.35	19.5	14.7	17.7	9.25	6.85	42	58	71.5	82	72	181.5	263.9	745.5
PI642998	7.5	21.25	7.35	16.15	5.45	9.45	NA	19.5	NA	22	11.15	62	13.65	223.5
PI65121	NA	NA	NA	NA	NA	NA	NA	NA	NA	NA	NA	NA	NA	NA
PI651492	21.85	20.9	13.95	16.6	8.9	8.65	26.3	41	46.8	57	215.3	222	362.1	664.5
PI651496	17.1	19.95	12.6	15.05	8.05	7.2	61.8	35.5	138.6	50	272.95	158	405.5	465.5
PI653616	26.1	20.2	18.05	13.55	10.6	7.05	93.1	31	202.6	40	501.95	128	731.05	476
PI655970	15.75	22.4	11.95	12.05	7.55	6.65	43.55	45	109.15	72.5	39.6	84	146.95	380.5
PI655971	9.9	17.35	8.1	6.15	6.45	8.6	8.4	12.5	15.4	13	8.1	14	35.15	27.5
PI655972	12.5	17.25	10	15	6.4	7.3	NA	18	NA	26.5	37.75	22.5	101.8	98
PI655973	14.65	22.4	11.35	16.7	7.8	10.45	34.05	52.5	64.7	102	41.4	129	146.85	454.5
PI655974	14.75	21.9	9	13.8	7.3	8.7	31.65	15.5	87	22.5	28.8	34.5	114.05	172
PI655975	11.3	20	5.6	9.45	5.95	9.1	19.95	20	35.6	23.5	7.85	10.5	29.85	45
PI655976	11.95	15.4	6.9	9.1	5.9	6.3	19.05	11.5	41.35	13.5	17.35	13	55.85	59.5
PI655977	13.65	21.55	7.25	13.6	6.35	8.6	23.65	25.5	76.1	51.5	9.2	25	39.7	101
PI655978	9.55	22.15	8.3	9.05	8.8	9.65	18	44	51.9	81.5	10.95	34.5	42.7	166.5
PI655979	14.9	14.7	6.8	11	8.85	8.05	23.2	46.5	45.6	120	16.55	34	60.5	140.5
PI655980	13.1	17.3	8.05	11.25	4.95	6	87.95	46.5	163.1	108.5	189.05	195	730.85	759
PI655981	13.7	19.55	10.15	10.95	5.5	5.65	21.75	41	37.75	52	34.95	111	106.55	314
PI655982	11.65	18.1	6.55	9	5.4	8.65	27	38	65.25	116.5	21.45	22.5	83.85	107.5
PI655983	13.45	17.35	11.85	11.85	5.55	6.15	23	23.5	24.8	36	130.7	79.5	312.7	315.5
PI655985	10.4	16.1	5.25	11.4	5.75	8.9	10.85	39	14.95	46.5	5.7	15	18.6	81
PI655986	10.95	13.9	8.45	9.3	5.8	8.65	9.85	22.5	19.7	39	6.95	25.5	33	119
PI655987	11.4	17.55	6.95	11.3	6.25	10.4	20.5	29	47.45	119	13.75	22	60.3	240
PI655988	12.55	15.5	7.05	9.05	6.65	8.4	22.25	39	61.5	77.5	26.35	30.5	100.2	169
PI655989	9.8	20.2	5.8	10.35	5.95	10.65	11.2	40.5	21	102	7.25	33.5	23.15	319.5
PI655990	13.6	16.45	6.7	9.35	6.05	6.3	12.7	15.5	27.9	26.5	11.65	20	39.45	96.5
PI655991	18.35	18.5	10.6	13.5	9	9.5	45.35	49.5	132.15	132	27.9	75	126.1	258.5
PI655992	13.55	18.9	8.5	11.95	7.5	9.2	28.9	15	67	27	27.2	18	127.8	97
PI655993	12.2	17.7	6.5	8.45	6.65	8.35	18.95	21.5	54.35	44	7.75	13.5	35.7	68
PI655994	13.95	15	10.75	14	7	10.5	11.25	12	26.65	25	22.2	35.5	87	216
PI655995	14.35	18.95	14.25	13.2	9.6	7.8	26.15	18	37.05	29.5	73.2	29	192.3	152.5
PI655996	10.8	21.3	7.2	12.45	6.05	11.6	16	74.5	48.75	227	9.7	75.5	32.1	335.5
PI655997	13.4	25.4	6	10.3	5.8	8.3	20	73.5	51.5	161.5	9.5	76.5	36.95	367.5
PI655998	12.05	16.7	6.05	9.7	6.25	9.1	14.55	41.5	44.55	83.5	6.95	42	30.25	184
PI655999	9.6	9.2	7.15	8	3.6	2.85	24.85	85	40.85	169.5	46.7	319.5	154.5	1082
PI656000	17	25.1	8.8	11.45	6.15	9.1	29.55	47	67.6	125	25.7	41.5	96.05	178
PI656001	15.05	18.1	9.9	13.1	8.1	8.65	28.05	59	67.5	115	16.95	88	70.75	332
PI656003	16.15	14.35	12.5	9.45	7.85	6.2	29.475	38.5	75.125	79	36.525	62.25	128.6	268.25
PI656004	15.65	NA	8.3	NA	8.7	NA	29.25	NA	86.4	NA	19.65	NA	102.05	NA
PI656010	14.7	19	7.45	11.8	7.8	12.55	22.2	26.5	51.8	50	16.7	28.5	54.15	177
PI656011	13.75	20.75	10.15	15.9	6.55	11.7	75.25	50.5	137.9	117	243.55	102	421.05	327.5
PI656012	21.15	21.2	11.75	15.7	8.35	9	66.7	35.5	181.3	63	65.9	45.5	270.4	183.5
PI656013	12.2	17.3	9.65	17.65	7.05	15.85	16.75	22.5	27.1	25	23.75	44.5	70.05	184
PI656014	13.2	21.2	11.55	15.45	7.65	9	17.55	14.5	26.5	23	19.35	22	86.65	132
PI656015	12.7	16.6	8.05	12.95	6	8.8	31.15	17	98.7	34.5	28.65	28	111.4	115.5
PI656016	16.8	25.95	10.35	17.2	7.2	12.95	32.65	39	90.6	70.5	21.5	32.5	85.75	165.5
PI656017	12.15	21.3	8.7	19.5	4.2	11.75	43.1	63.5	63.9	119.5	49.95	73	119.4	294
PI656018	15.75	16.6	9.9	11.1	9	8.05	33.55	27	96.25	77.5	33.1	24.5	93.4	104
PI656019	12.25	17.05	7.7	10.95	6.1	9.65	13.85	20.5	27.1	43	13.05	22.5	47.9	129.5
PI656022	10.9	17.2	5.35	10.85	5.2	10.1	17.6	28	40.05	51.5	31.3	27	56.65	132.5
PI656023	13.7	18.55	11.35	12.15	7.55	8.5	32.65	25	53.1	48.5	47.05	42.5	116.25	149
PI656024	13.5	21.65	11.95	20.55	8.9	11.7	26.7	72	40.65	118.5	72.2	199	188.3	974.5
PI656025	11.5	16.15	9.6	13.5	7.45	11.7	18.3	12	26.55	16.5	16.6	21.5	53.15	93
PI656026	14.75	23.25	12.45	17.75	7.85	10	26.95	49	71.45	121.5	22.1	58	82.5	237
PI656027	15.65	22	12.55	17	8.4	9.5	43.9	44	97.15	94.5	87.55	72.5	179.5	302
PI656028	13.9	17.5	10.05	11.35	7.3	7.9	21.8	27.5	27.8	32	55.9	87.5	119.8	276
PI656029	16.05	26.55	8.5	10.75	8.15	9.75	32.1	34	91.5	73	23.6	28	71.9	109.5
PI656030	9.25	6.4	5.4	5.7	6.1	6	10.7	26	16.75	37	14.6	27	37.6	94
PI656031	14.95	16.25	8.5	12.65	6.15	7	31.2	40.5	71.4	123.5	18.6	50	56.95	238
PI656032	14.4	17.1	11.5	11.75	7.85	7.6	33	75	66.5	132.5	47.5	200	134.6	532.5
PI656033	19.65	16.55	11.4	10.1	9.35	8.75	37.3	49	94.05	96	25.5	37.5	102.35	188
PI656034	19.2	15.45	13	11.95	9.35	8.05	57.6	49.5	182.05	98	40.05	48	158.7	195
PI656035	13.05	15.2	10.85	16.75	8.2	12.2	36.25	22.5	105.75	41	41.15	69.5	162.6	248.5
PI656036	20.15	18.35	16.4	12.35	7.5	10.2	50.75	37	59.75	82	216.85	120	487.15	429
PI656037	14.35	22.75	12.45	16.5	9.05	10.75	27.9	78	75.55	155	49.3	125.5	151.65	557
PI656038	17.65	24.5	10.95	14.3	7.05	6.7	31	23	42.9	41	202.95	92	322.65	455.5
PI656041	17.35	22.65	10.3	5.5	7.5	4.5	32.05	26.5	56.15	31	30.5	24	90.1	69.5
PI656042	15.15	18.55	6.8	11.3	7.05	10.15	47.3	35.5	142.05	74.5	29.5	46	99.45	165
PI656043	17.1	22.15	12.5	21.9	6.7	11.55	38.9	46.5	53.75	78	64.85	114	212.2	549
PI656044	13.75	24.85	11.5	11.1	7.9	8.35	38.55	73	82.45	160.5	31.05	84.5	114.9	348
PI656046	13.05	13.55	11.95	11.85	8.95	11.2	24.3	15	51.7	16.5	23.55	11.5	90.55	59.5
PI656047	14.6	NA	11.45	NA	6.25	NA	46.4	NA	76.55	NA	146.2	NA	352.3	NA
PI656048	15.7	22.8	9.6	14.7	6.95	12.2	36.95	133	102.6	258	32.55	170	109.25	692
PI656049	19.6	24.55	12.8	15.4	8.3	9.4	35.7	22.5	90.8	28	30.15	44.5	128.6	208.5
PI656050	13.7	17.25	10.35	15	8.5	10.15	32.25	39.5	82.25	84.5	49.4	87	179.1	323.5
PI656051	13.5	15.5	10.65	11.2	6.65	8.75	47.7	48.5	131.8	119.5	53.9	78	182.05	291.5
PI656052	12.95	20.45	7.6	10.65	5.65	8.85	14.65	20	36.65	41.5	8.2	11.5	24	72.5
PI656053	19.25	17	8.75	9	7.65	6.75	55.7	54	138.95	136.5	37.65	50.5	135.45	204
PI656055	20.4	22.55	8.6	12.5	7.75	7.65	49.3	27.5	130.65	53	21.95	26	132.95	169
PI656056	17.75	25.95	11	8.6	8.15	7.7	53.45	133	184.15	307.5	24.6	117	106.35	601
PI656058	16.8	21.35	9.95	13.8	8.8	9.75	37.15	35.5	96.55	90.5	29.4	38.5	123.8	177
PI656059	18	19.7	11	17.25	9.15	11	39.4	50.5	101.75	96.5	22.55	58	115.4	226
PI656062	19.7	22.75	12.6	16.35	8.75	11.35	50.25	179	90.55	352.5	88.2	367.5	182.5	1301.5
PI656063	13.1	19	6.25	10.45	6.45	8.3	20.95	41	46.55	124.5	15.85	37	50.05	137.5
PI656064	20.15	22.5	15.7	19.15	10.9	12.3	53.6	69	68.75	124.5	180.85	285.5	343.05	826
PI656065	12.65	18	9.4	13.8	7.05	10.05	27.45	41	65.8	94	24.8	64	93.9	283.5
PI656066	23.75	29.6	14.7	23.75	10.65	12.55	64.25	96	118.75	163.5	255.3	344.5	454.05	1134.5
PI656067	13.65	21.9	13.95	26.7	9.9	11.6	42.1	82	59.8	154.5	151.05	322	275.9	1147
PI656068	13.15	24.65	8.8	10	8	8.05	51.85	50.5	141.55	94	28.9	47	105.3	194.5
PI656069	18.55	NA	9.2	NA	7.4	NA	42.85	NA	115.85	NA	41.3	NA	101.3	NA
PI656070	20.5	17.3	8.95	8.4	8.9	7	41.85	42	107.8	81	28.35	34.5	89.9	131.5
PI656071	14.6	26.5	11.55	21.4	8.75	13.1	27.65	38.5	60.6	62	25.95	57.5	80.15	205.5
PI656072	15.95	18.95	9	12	10	11.25	27	42.5	63	90	21.6	46.5	56.1	155
PI656074	13.6	18.7	9.15	13.25	5.2	6.9	50.8	96.5	151.65	253.5	75.5	263	277.85	826.5
PI656075	18.5	21.6	14.15	12.4	7.4	8.2	50.05	44.5	107.9	101	38.95	46	119.25	193.5
PI656076	12.5	25.6	NA	15.55	NA	10.4	26.9	88	41.1	184.5	18.35	86	72.7	367
PI656077	9.55	17.1	9.75	11.45	8.8	9.6	26.75	17.5	58.4	25.5	20.95	14.5	87	64.5
PI656078	18.55	16.9	10.7	11	11.75	9.3	32.2	14.5	81.55	20.5	22.05	13	98.6	73.5
PI656079	13.55	22.65	8.25	13.5	5.95	9.9	23.2	34	51.8	68.5	21.1	39	70.95	140
PI656080	12.25	14.75	6.55	7.75	5.75	6.95	18.9	15	28.8	23	20.2	10	62.95	41.5
PI656081	9.65	13.05	5.7	9.6	3.2	5.5	18.8	33	32.45	63	24.75	83	53.45	222
PI656082	23.3	22.4	10.5	9.75	10.95	9.7	41.25	31.5	116.05	NA	57.5	27	177.85	NA
PI656083	16.05	21.35	10	13	7.1	7.85	23.45	104	35.15	198	48.95	170	138.35	598.5
PI656085	16.85	20.55	8.4	8.95	7.7	9.45	33.4	22	90.75	44	17.75	16.5	92.85	92.5
PI656086	18.45	21.1	10.7	13.5	7.2	9.85	44.55	19.5	126.35	21	47.75	24	212.75	161
PI656087	10.5	16	7.1	11.2	6.25	10.8	10.95	11.5	71.9	15	7	16.5	110	52
PI656088	14.4	14.9	7.9	6.1	8.65	9.3	37.1	81.5	98.45	NA	24.25	64	96.45	NA
PI656089	14.3	17.5	9.4	15.6	8.55	9.3	23.8	26.5	57.8	48.5	28.05	58.5	91.85	205.5
PI656090	12.5	13.75	9.65	9.6	5.75	5.95	38.85	64.5	107.05	179.5	45.05	104	164.15	390
PI656091	11.75	17.2	8.05	10.15	8.55	9.7	27.35	42	53.55	91	34.9	28.5	44.7	94.5
PI656092	16.2	20.5	9.6	11.25	9.35	12.3	44.95	50.5	131	110.5	28.45	44.5	129.05	198.5
PI656093	19.35	14.8	9.95	13.1	7.3	9.5	32.15	42.5	82.5	88	28.15	93.5	106.15	344.5
PI656094	13.6	14.6	9.15	10.5	6.05	6.45	63.45	23.5	167.6	45.5	63.65	29.5	260.7	130
PI656095	11.85	19.1	10.25	15.25	8.6	11.15	13.85	42	25.9	64	9.1	40	36.95	159.5
PI656096	13.9	25.8	8.9	15.7	8.85	11.9	28.45	106	67.75	218	30.7	149	115.25	503
PI656097	16.45	14.4	13.4	14.85	11	11.4	40.55	19.5	74.45	45	110.1	38	205.45	168
PI656099	21.9	24.3	16.9	18.95	12.05	13.6	72.25	43.5	122	73	208.6	84	361.2	385
PI656100	14.05	14.35	10.95	11.3	6.05	9.85	29.65	19	54.25	38	19.35	25.5	52.95	106.5
PI656101	10.8	14.05	7.3	10.35	4.95	7.4	51.65	91	110.1	186	107.8	148.5	326	451
PI656102	12.55	12.25	8.3	9.65	6.35	7.15	23.7	11.5	85	20.5	30.4	10.5	168.85	49.5
PI656103	13.45	12.35	12.45	11.1	9.2	11.1	21.65	9.5	99.3	10.5	18.55	10	65.7	24
PI656104	10.35	11.05	6.7	8.55	5.05	6.7	16.25	13.5	30.1	30.5	17.5	35	61.55	125.5
PI656105	11.2	18.05	5.7	10.05	5.35	9.35	21.35	29	58.4	70	9.75	35.5	34.35	150.5
PI656106	18	18.75	14.1	12.9	9.4	7	66.45	80.5	256.85	252	34.8	98	122.9	381
PI656107	17.35	22.6	11.95	13.95	7.95	9.9	52.35	52.5	80.7	102	97.35	84.5	190.3	247
PI656108	13.05	14.25	8.35	13.2	7.4	9.45	15.35	17.5	25.8	40	21.85	23.5	75.35	125
PI656109	11.9	17.05	7.1	8.8	6.15	8.6	11.15	11.5	23.6	18	13.65	11	52.7	56.5
PI656110	19.95	15.7	7.95	9.3	6.8	10.2	24.95	36	33.5	41	18	35.5	64.9	112.5
PI656111	12.9	20.4	8.05	10.95	5.5	7.55	43.15	84	97.65	251	54.9	117	136.35	463.5
PI656112	11.05	17.05	7.95	12.5	6.3	11.45	13.35	21.5	39.25	38.5	8.95	23	40.75	100.5
PI656113	12.7	17.05	5.95	10.6	6.05	8.6	17.2	51.5	34.05	66	19.75	55	69.65	250.5
PI656114	15.8	20.05	7.95	8.7	6.3	7.9	21.45	61	77.9	163	19.15	86.5	84.1	333
PI656115	13.25	13.65	8.55	9.4	4.45	4.5	11.2	20	30.15	49.5	15.5	24	59.05	109.5
PI656116	11.1	10.65	7.1	6.3	4.3	5.7	23.15	29	34.3	64	40.35	35	94	156
PI656117	12.9	NA	12.6	NA	6.45	NA	34.8	NA	101.65	NA	36.45	NA	123.1	NA
PI656118	16.1	19.35	8	9.05	5.9	7.5	36.05	26.5	96.2	52	26.85	19	101.4	80.5
PI656119	13.45	17.45	5.8	14.2	5.95	10.4	23.3	34.5	62.7	61.5	20.45	33	69.6	117
PI656120	17.1	13.75	11.65	13.15	8.1	9.45	20.95	17.5	56.7	35.5	14	18	65.55	104
PI656121	13.5	16.5	8.05	9.1	6.8	8.1	14	48	34.35	77.5	14.05	68.5	66.55	301.5
